# Supplementary material for: Physiological and Proteomic Analysis of Different Molecular Mechanisms of Sugar Beet Response to Acidic and Alkaline pH Environment
Source: Front Plant Sci. 2021 Jun 9;12:682799. doi: 10.3389/fpls.2021.682799 (PMC8220161; doi:10.3389/fpls.2021.682799)
Supplement: Supplementary Table 8 — Identification of differential expression proteins (DEPs) in the roots of pH 5 vs. pH 9.5 group. [file Table_8.XLSX]

## Sheet: DEPs-root (pH5 vs pH9.5)
Table S8. Identification of differential expression proteins (DEPs) in the roots of pH5 vs pH9.5.
Functional classification	Accession	Description	FC(PH5_R/PH95_R)	Log2FC(PH5_R/PH95_R)	P_value(PH5_R/PH95_R)	Regulate	Significant	PH5_R	PH95_R	PH95_R_1	PH95_R_2	PH95_R_3	PH5_R_1	PH5_R_2	PH5_R_3	GO Term	GO ID	KO ID	KO Name	Pathway ID	Pathway_defition	COG ID	COG_Functional Categories	Pfam ID	Domain	Domain Description	Subcellular Loc	Unique Peptides	Coverage（%）	MW [kDa]	FDR Confidence
Cell wall synthesis	XP_010672708.1	PREDICTED: polygalacturonase inhibitor [Beta vulgaris subsp. vulgaris]	1.23569	0.305317	0.006403	up	yes	1.047	0.8473	0.845	0.846	0.851	1	1.019	1.123	------	------	------	------	------	------	------	------	PF12799.4;PF13855.3;PF08263.9	LRR_4;LRR_8;LRRNT_2	Leucine Rich repeats;Leucine rich repeat;Leucine rich repeat N-terminal domain	ER	2	4	37.4	High
Cell wall synthesis	XP_010677136.1	PREDICTED: expansin-like B1 [Beta vulgaris subsp. vulgaris]	0.839416	-0.252542	0.02094	down	yes	1.035	1.233	1.192	1.333	1.173	1	1.058	1.047	------	------	------	------	------	------	------	------	PF01357.18;PF03330.15	Pollen_allerg_1;DPBB_1	Pollen allergen;Lytic transglycolase	ER	2	12	28	High
Cell wall synthesis	XP_010670609.1	PREDICTED: expansin-A4 [Beta vulgaris subsp. vulgaris]	1.38153	0.466268	0.04072	up	yes	0.944	0.6833	0.826	0.539	0.685	1	0.917	0.915	------	------	------	------	------	------	------	------	PF01357.18;PF03330.15	Pollen_allerg_1;DPBB_1	Pollen allergen;Lytic transglycolase	extracellular	2	13	27	High
Metabolism	XP_010676217.1	PREDICTED: primary amine oxidase [Beta vulgaris subsp. vulgaris]	0.672655	-0.572062	0.000285	down	yes	1.011	1.503	1.544	1.521	1.443	1	0.97	1.064	------	------	K00276	AOC3, AOC2, tynA	bvg00950;bvg00960;bvg00350;bvg00410;bvg00260;bvg00360	Isoquinoline alkaloid biosynthesis;Tropane, piperidine and pyridine alkaloid biosynthesis;Tyrosine metabolism;beta-Alanine metabolism;Glycine, serine and threonine metabolism;Phenylalanine metabolism	COG3733	Q:Secondary metabolites biosynthesis, transport and catabolism	PF01179.17;PF02728.13;PF02727.13	Cu_amine_oxid;Cu_amine_oxidN3;Cu_amine_oxidN2	Copper amine oxidase, enzyme domain;Copper amine oxidase, N3 domain;Copper amine oxidase, N2 domain	Golgi apparatus	9	17	81.5	High
Metabolism	XP_010675399.1	PREDICTED: riboflavin synthase [Beta vulgaris subsp. vulgaris]	0.726323	-0.461317	0.009042	down	yes	1.043	1.436	1.331	1.587	1.391	1	1.029	1.101	------	------	K00793	ribE, RIB5	bvg00740	Riboflavin metabolism	COG0307	H:Coenzyme transport and metabolism	PF00677.14	Lum_binding	Lumazine binding domain	chloroplast	5	21	30.8	High
Metabolism	XP_010693704.1	PREDICTED: uncharacterized PKHD-type hydroxylase At1g22950 [Beta vulgaris subsp. vulgaris]	0.72479	-0.464365	0.003853	down	yes	1.035	1.428	1.304	1.472	1.508	1	1.051	1.055	MF:L-ascorbic acid binding;MF:iron ion binding;MF:oxidoreductase activity, acting on paired donors, with incorporation or reduction of molecular oxygen;	GO:0031418;GO:0005506;GO:0016705	------	------	------	------	------	------	------	------	------	cytoplasmic	2	8	44.6	High
Metabolism	XP_010672526.1	PREDICTED: 6,7-dimethyl-8-ribityllumazine synthase, chloroplastic [Beta vulgaris subsp. vulgaris]	0.671001	-0.575614	0.001617	down	yes	0.9857	1.469	1.386	1.583	1.439	1	0.938	1.019	BP:riboflavin biosynthetic process;CC:riboflavin synthase complex;MF:6,7-dimethyl-8-ribityllumazine synthase activity;	GO:0009231;GO:0009349;GO:0000906	K00794	ribH, RIB4	bvg00740	Riboflavin metabolism	COG0054	H:Coenzyme transport and metabolism	PF00885.16	DMRL_synthase	6,7-dimethyl-8-ribityllumazine synthase	chloroplast	8	31	23.8	High
Metabolism	XP_010676213.1	PREDICTED: primary amine oxidase [Beta vulgaris subsp. vulgaris]	0.688705	-0.538041	0.004448	down	yes	1	1.452	1.364	1.603	1.389	1	0.968	1.033	------	------	K00276	AOC3, AOC2, tynA	bvg00950;bvg00960;bvg00350;bvg00410;bvg00260;bvg00360	Isoquinoline alkaloid biosynthesis;Tropane, piperidine and pyridine alkaloid biosynthesis;Tyrosine metabolism;beta-Alanine metabolism;Glycine, serine and threonine metabolism;Phenylalanine metabolism	COG3733	Q:Secondary metabolites biosynthesis, transport and catabolism	PF01179.17;PF02728.13;PF02727.13	Cu_amine_oxid;Cu_amine_oxidN3;Cu_amine_oxidN2	Copper amine oxidase, enzyme domain;Copper amine oxidase, N3 domain;Copper amine oxidase, N2 domain	ER	12	21	81.8	High
Metabolism	XP_010690537.1	PREDICTED: bifunctional riboflavin biosynthesis protein RIBA 1, chloroplastic [Beta vulgaris subsp. vulgaris]	0.668008	-0.582062	0.004889	down	yes	0.9793	1.466	1.353	1.631	1.414	1	0.996	0.942	------	------	K14652	ribBA	bvg00740	Riboflavin metabolism	COG0807;COG0108	H:Coenzyme transport and metabolism;	PF00926.16;PF00925.17	DHBP_synthase;GTP_cyclohydro2	3,4-dihydroxy-2-butanone 4-phosphate synthase;GTP cyclohydrolase II	chloroplast	11	20	60.5	High
Metabolism	XP_010669543.1	PREDICTED: glucan endo-1,3-beta-glucosidase 5 [Beta vulgaris subsp. vulgaris]	0.789355	-0.341253	0.008693	down	yes	1.053	1.334	1.295	1.431	1.277	1	1.047	1.113	------	------	K19893	GN5_6	bvg00500	Starch and sucrose metabolism	------	------	PF00332.15;PF07983.10	Glyco_hydro_17;X8	Glycosyl hydrolases family 17;X8 domain	extracellular	7	19	55.1	High
Metabolism	XP_010686043.1	PREDICTED: alcohol-forming fatty acyl-CoA reductase [Beta vulgaris subsp. vulgaris]	0.721953	-0.470023	0.003557	down	yes	0.9833	1.362	1.353	1.454	1.278	1	1.033	0.917	------	------	K13356	FAR	bvg04146;bvg00073	Peroxisome;Cutin, suberine and wax biosynthesis	------	------	PF07993.9;PF03015.16;PF01370.18	NAD_binding_4;Sterile;Epimerase	Male sterility protein;Male sterility protein;NAD dependent epimerase/dehydratase family	peroxisomal	2	5	55.4	High
Metabolism	XP_010692429.1	PREDICTED: flavonol sulfotransferase-like [Beta vulgaris subsp. vulgaris]	0.76015	-0.395643	0.007059	down	yes	1.011	1.33	1.291	1.409	1.289	1	0.933	1.1	------	------	------	------	------	------	------	------	PF00685.24;PF13469.3	Sulfotransfer_1;Sulfotransfer_3	Sulfotransferase domain;Sulfotransferase family	cytoplasmic	3	11	39.6	High
Metabolism	XP_010677275.1	PREDICTED: glycine cleavage system H protein, mitochondrial [Beta vulgaris subsp. vulgaris]	0.750038	-0.414965	0.03427	down	yes	0.9983	1.331	1.221	1.538	1.234	1	0.964	1.031	------	------	K02437	gcvH, GCSH	bvg00260;bvg00630	Glycine, serine and threonine metabolism;Glyoxylate and dicarboxylate metabolism	COG0509	E:Amino acid transport and metabolism	PF01597.16	GCV_H	Glycine cleavage H-protein	mitochondrial	2	22	17.5	High
Metabolism	XP_010687941.1	PREDICTED: caffeic acid 3-O-methyltransferase [Beta vulgaris subsp. vulgaris]	0.808892	-0.30598	0.009394	down	yes	1.037	1.282	1.302	1.203	1.342	1	1.01	1.101	------	------	K13066	E2.1.1.68, COMT	bvg00940	Phenylpropanoid biosynthesis	------	------	PF00891.15;PF08100.8	Methyltransf_2;Dimerisation	O-methyltransferase;Dimerisation domain	cytoplasmic	21	67	41	High
Metabolism	XP_010690617.1	PREDICTED: scopoletin glucosyltransferase [Beta vulgaris subsp. vulgaris]	0.743223	-0.428133	0.02256	down	yes	0.987	1.328	1.158	1.481	1.346	1	0.961	1	------	------	------	------	------	------	------	------	PF00201.15	UDPGT	UDP-glucoronosyl and UDP-glucosyl transferase	cytoplasmic	5	11	54.6	High
Metabolism	XP_010679975.1	PREDICTED: probable protein S-acyltransferase 7 [Beta vulgaris subsp. vulgaris]	0.706672	-0.500888	0.04961	down	yes	0.9533	1.349	1.46	1.073	1.513	1	0.896	0.964	------	------	K16675	ZDHHC9_14_18	------	------	COG5273	R:General function prediction only	PF01529.17	zf-DHHC	DHHC palmitoyltransferase	plasma membrane	2	8	48.9	High
Metabolism	XP_010675709.1	PREDICTED: 1-acyl-sn-glycerol-3-phosphate acyltransferase [Beta vulgaris subsp. vulgaris]	0.834538	-0.26095	0.03443	down	yes	1.039	1.245	1.155	1.33	1.251	1	0.996	1.122	------	------	------	------	------	------	COG0204	I:Lipid transport and metabolism	PF01553.18	Acyltransferase	Acyltransferase	peroxisomal	2	5	33.6	High
Metabolism	XP_010695197.1	PREDICTED: flavonoid 3'-monooxygenase [Beta vulgaris subsp. vulgaris]	0.734939	-0.444304	0.000816	down	yes	0.9613	1.308	1.34	1.252	1.331	1	0.972	0.912	------	------	K05280	E1.14.13.21	bvg00941;bvg00944	Flavonoid biosynthesis;Flavone and flavonol biosynthesis	COG2124	Q:Secondary metabolites biosynthesis, transport and catabolism	PF00067.19	p450	Cytochrome P450	ER	3	8	57	High
Metabolism	XP_010673724.1	PREDICTED: serine--glyoxylate aminotransferase [Beta vulgaris subsp. vulgaris]	0.799682	-0.322502	0.003258	down	yes	1.006	1.258	1.251	1.324	1.199	1	0.98	1.038	------	------	K00830	AGXT	bvg00250;bvg00260;bvg04146;bvg00630;bvg01200	Alanine, aspartate and glutamate metabolism;Glycine, serine and threonine metabolism;Peroxisome;Glyoxylate and dicarboxylate metabolism;Carbon metabolism	COG0075	E:Amino acid transport and metabolism	PF00266.16	Aminotran_5	Aminotransferase class-V	peroxisomal	9	25	44	High
Metabolism	XP_010678277.1	PREDICTED: omega-hydroxypalmitate O-feruloyl transferase [Beta vulgaris subsp. vulgaris]	0.787202	-0.345194	0.00214	down	yes	0.9903	1.258	1.253	1.321	1.201	1	0.96	1.011	------	------	K15400	HHT1	bvg00073	Cutin, suberine and wax biosynthesis	------	------	PF02458.12	Transferase	Transferase family	cytoplasmic	23	62	48.3	High
Metabolism	XP_010695883.1	PREDICTED: non-functional NADPH-dependent codeinone reductase 2 [Beta vulgaris subsp. vulgaris]	0.842798	-0.246741	0.001745	down	yes	1.024	1.215	1.207	1.192	1.245	1	1.007	1.064	MF:oxidoreductase activity;	GO:0016491	------	------	------	------	------	------	PF00248.18	Aldo_ket_red	Aldo/keto reductase family	peroxisomal	2	5	35.7	High
Metabolism	XP_010687079.1	PREDICTED: serine/threonine-protein phosphatase 6 regulatory subunit 3 [Beta vulgaris subsp. vulgaris]	0.768067	-0.380697	0.002735	down	yes	0.9693	1.262	1.19	1.287	1.31	1	0.92	0.988	BP:regulation of phosphoprotein phosphatase activity;CC:vacuolar membrane;MF:protein phosphatase binding;	GO:0043666;GO:0005774;GO:0019903	K15501	PPP6R3, SAPS3	------	------	------	------	PF04499.12	SAPS	SIT4 phosphatase-associated protein	cytoplasmic	6	11	86.5	High
Metabolism	XP_010680734.1	PREDICTED: probable inactive purple acid phosphatase 2 [Beta vulgaris subsp. vulgaris]	0.832237	-0.264934	0.008403	down	yes	1.012	1.216	1.143	1.284	1.221	1	1.004	1.033	------	------	------	------	------	------	COG1409	R:General function prediction only	PF16656.2;PF00149.25;PF14008.3	Pur_ac_phosph_N;Metallophos;Metallophos_C	Purple acid Phosphatase, N-terminal domain;Calcineurin-like phosphoesterase;Iron/zinc purple acid phosphatase-like protein C	extracellular	11	21	74.6	High
Metabolism	XP_010675311.1	PREDICTED: gamma-glutamyl hydrolase 2 [Beta vulgaris subsp. vulgaris]	0.817959	-0.289899	0.000276	down	yes	1.002	1.225	1.225	1.249	1.202	1	0.981	1.025	------	------	K01307	GGH	bvg00790	Folate biosynthesis	------	------	PF07722.10;PF00117.25	Peptidase_C26;GATase	Peptidase C26;Glutamine amidotransferase class-I	ER	6	21	42.3	High
Metabolism	XP_010682967.1	PREDICTED: alpha-mannosidase At3g26720-like [Beta vulgaris subsp. vulgaris]	0.83719	-0.256373	0.006546	down	yes	1.013	1.21	1.175	1.284	1.17	1	1.022	1.018	------	------	K01191	E3.2.1.24	bvg00511	Other glycan degradation	------	------	PF07748.10;PF01074.19;PF09261.8	Glyco_hydro_38C;Glyco_hydro_38;Alpha-mann_mid	Glycosyl hydrolases family 38 C-terminal domain;Glycosyl hydrolases family 38 N-terminal domain;Alpha mannosidase middle domain	ER	25	28	115.7	High
Metabolism	XP_010667687.1	PREDICTED: cytochrome P450 71A3-like [Beta vulgaris subsp. vulgaris]	0.791297	-0.337708	0.005653	down	yes	0.982	1.241	1.177	1.302	1.243	1	1.025	0.921	------	------	------	------	------	------	------	------	PF00067.19	p450	Cytochrome P450	ER	6	20	58.1	High
Metabolism	XP_010688309.1	PREDICTED: NADP-dependent malic enzyme [Beta vulgaris subsp. vulgaris]	0.836364	-0.257798	0.03556	down	yes	1.012	1.21	1.128	1.335	1.168	1	1.021	1.014	------	------	K00029	E1.1.1.40, maeB	bvg01200;bvg00620;bvg00710	Carbon metabolism;Pyruvate metabolism;Carbon fixation in photosynthetic organisms	COG0281	C:Energy production and conversion	PF03949.12;PF00390.16	Malic_M;malic	Malic enzyme, NAD binding domain;Malic enzyme, N-terminal domain	cytoplasmic	21	54	64.5	High
Metabolism	XP_010666650.1	PREDICTED: NADH--cytochrome b5 reductase 1 [Beta vulgaris subsp. vulgaris]	0.835401	-0.259459	0.009862	down	yes	1.01	1.209	1.184	1.29	1.152	1	0.998	1.031	CC:integral component of membrane;MF:cytochrome-b5 reductase activity, acting on NA;	GO:0016021;GO:0004128	K00326	E1.6.2.2	bvg00520	Amino sugar and nucleotide sugar metabolism	COG0543	C:Energy production and conversion	PF00970.21;PF00175.18	FAD_binding_6;NAD_binding_1	Oxidoreductase FAD-binding domain;Oxidoreductase NAD-binding domain	Golgi apparatus	5	16	34.4	High
Metabolism	XP_010689121.1	PREDICTED: alpha-L-fucosidase 1 [Beta vulgaris subsp. vulgaris]	0.83887	-0.25348	0.01783	down	yes	1.01	1.204	1.185	1.238	1.188	1	0.935	1.096	------	------	K01206	FUCA	bvg00511	Other glycan degradation	COG3669	G:Carbohydrate transport and metabolism	PF01120.14	Alpha_L_fucos	Alpha-L-fucosidase	cytoplasmic	4	7	61.6	High
Metabolism	XP_010687495.1	PREDICTED: alcohol-forming fatty acyl-CoA reductase [Beta vulgaris subsp. vulgaris]	0.833471	-0.262795	0.002989	down	yes	1.006	1.207	1.239	1.19	1.193	1	0.962	1.055	BP:lipid metabolic process;CC:integral component of membrane;MF:alcohol-forming fatty acyl-CoA reductase activity;MF:fatty-acyl-CoA reductas;	GO:0006629;GO:0016021;GO:0102965;GO:0080019	K13356	FAR	bvg04146;bvg00073	Peroxisome;Cutin, suberine and wax biosynthesis	------	------	PF07993.9;PF03015.16;PF01370.18	NAD_binding_4;Sterile;Epimerase	Male sterility protein;Male sterility protein;NAD dependent epimerase/dehydratase family	peroxisomal	4	8	54.9	High
Metabolism	XP_010670410.1	PREDICTED: feruloyl CoA ortho-hydroxylase 2 isoform X1 [Beta vulgaris subsp. vulgaris]	0.838926	-0.253384	0.004578	down	yes	1	1.192	1.145	1.254	1.176	1	0.986	1.014	------	------	------	------	------	------	COG3491	R:General function prediction only	PF03171.17;PF14226.3	2OG-FeII_Oxy;DIOX_N	2OG-F;non-haem dioxygenase in morphine synthesis N-terminal	cytoplasmic	2	9	36.6	High
Metabolism	XP_010666945.1	PREDICTED: cytochrome b561 and DOMON domain-containing protein At4g12980 [Beta vulgaris subsp. vulgaris]	0.843291	-0.245897	0.03411	down	yes	0.9993	1.185	1.121	1.297	1.136	1	0.971	1.027	BP:oxidation-reduction process;CC:integral component of membrane;	GO:0055114;GO:0016021	------	------	------	------	------	------	PF04526.10;PF03188.13	DUF568;Cytochrom_B561	Protein of unknown function;Eukaryotic cytochrome b561	Golgi apparatus	7	18	41.7	High
Metabolism	XP_010676174.1	PREDICTED: acid beta-fructofuranosidase isoform X1 [Beta vulgaris subsp. vulgaris]	0.838837	-0.253537	0.002309	down	yes	0.9957	1.187	1.155	1.23	1.177	1	0.965	1.022	------	------	K01193	INV, sacA	bvg00500;bvg00052	Starch and sucrose metabolism;Galactose metabolism	------	------	PF00251.17;PF08244.9;PF11837.5	Glyco_hydro_32N;Glyco_hydro_32C;DUF3357	Glycosyl hydrolases family 32 N-terminal domain;Glycosyl hydrolases family 32 C terminal;Domain of unknown function	peroxisomal	17	23	77.4	High
Metabolism	XP_010683552.1	PREDICTED: cationic peroxidase 1 [Beta vulgaris subsp. vulgaris]	0.826196	-0.275443	0.01133	down	yes	0.984	1.191	1.238	1.194	1.141	1	0.913	1.039	------	------	K00430	E1.11.1.7	bvg00940	Phenylpropanoid biosynthesis	------	------	PF00141.20	peroxidase	Peroxidase	ER	2	6	34.7	High
Metabolism	XP_010685596.1	PREDICTED: cytochrome P450 86A1 [Beta vulgaris subsp. vulgaris]	0.831956	-0.265421	0.006105	down	yes	0.9867	1.186	1.234	1.187	1.137	1	0.938	1.022	------	------	K15401	CYP86A1	bvg00073	Cutin, suberine and wax biosynthesis	COG2124	Q:Secondary metabolites biosynthesis, transport and catabolism	PF00067.19	p450	Cytochrome P450	ER	11	25	59.9	High
Metabolism	NP_001289997.1	PREDICTED: probable sucrose-phosphate synthase [Beta vulgaris subsp. vulgaris]	0.845501	-0.242121	0.000331	down	yes	0.9867	1.167	1.143	1.176	1.182	1	0.967	0.993	BP:sucrose biosynthetic process;BP:nectar secretion;CC:cytosol;CC:plasma membrane;CC:plasmodesma;MF:sucrose synthase activity;MF:sucrose-phosphate synthase activity;	GO:0005986;GO:0071836;GO:0005829;GO:0005886;GO:0009506;GO:0016157;GO:0046524	K00696	E2.4.1.14	bvg00500	Starch and sucrose metabolism	COG0438	M:Cell wall/membrane/envelope biogenesis	PF00534.17;PF05116.10;PF13692.3;PF00862.16	Glycos_transf_1;S6PP;Glyco_trans_1_4;Sucrose_synth	Glycosyl transferases group 1;Sucrose-6F-phosphate phosphohydrolase;Glycosyl transferases group 1;Sucrose synthase	nuclear	8	15	118.1	High
Metabolism	XP_010678013.1	PREDICTED: nucleotide pyrophosphatase/phosphodiesterase [Beta vulgaris subsp. vulgaris]	0.821084	-0.284399	0.000697	down	yes	0.9697	1.181	1.173	1.166	1.205	1	0.974	0.935	------	------	------	------	------	------	------	------	PF00149.25;PF14008.3;PF16656.2	Metallophos;Metallophos_C;Pur_ac_phosph_N	Calcineurin-like phosphoesterase;Iron/zinc purple acid phosphatase-like protein C;Purple acid Phosphatase, N-terminal domain	Golgi apparatus	14	35	71.9	High
Metabolism	XP_010679821.1	PREDICTED: ribosomal RNA small subunit methyltransferase nep-1 [Beta vulgaris subsp. vulgaris]	0.68315	-0.549725	0.006273	down	yes	0.8717	1.276	1.335	1.275	1.218	1	0.763	0.852	------	------	K14568	EMG1, NEP1	bvg03008	Ribosome biogenesis in eukaryotes	COG1756	J:Translation, ribosomal structure and biogenesis	PF03587.11	EMG1	EMG1/NEP1 methyltransferase	nuclear	3	12	31.1	High
Metabolism	XP_010675388.1	PREDICTED: phosphoenolpyruvate carboxylase 2 [Beta vulgaris subsp. vulgaris]	0.793066	-0.334487	0.005637	down	yes	0.9493	1.197	1.161	1.237	1.194	1	0.978	0.87	------	------	K01595	ppc	bvg01200;bvg00620;bvg00710	Carbon metabolism;Pyruvate metabolism;Carbon fixation in photosynthetic organisms	COG2352	C:Energy production and conversion	PF00311.14	PEPcase	Phosphoenolpyruvate carboxylase	cytoplasmic	38	61	110.1	High
Metabolism	XP_010666077.1	PREDICTED: tyrosine aminotransferase [Beta vulgaris subsp. vulgaris]	0.84636	-0.240656	0.004609	down	yes	0.9767	1.154	1.175	1.159	1.129	1	0.921	1.009	BP:biosynthetic process;BP:cellular amino acid metabolic process;MF:transaminase activity;MF:pyridoxal phosphate binding;	GO:0009058;GO:0006520;GO:0008483;GO:0030170	K00815	TAT	bvg00950;bvg00960;bvg00270;bvg00400;bvg00130;bvg00350;bvg01230;bvg00360	Isoquinoline alkaloid biosynthesis;Tropane, piperidine and pyridine alkaloid biosynthesis;Cysteine and methionine metabolism;Phenylalanine, tyrosine and tryptophan biosynthesis;Ubiquinone and other terpenoid-quinone biosynthesis;Tyrosine metabolism;Biosynthesis of amino acids;Phenylalanine metabolism	COG0436	E:Amino acid transport and metabolism	PF00155.18	Aminotran_1_2	Aminotransferase class I and II	cytoplasmic	4	9	47.5	High
Metabolism	XP_010669495.1	PREDICTED: AIG2-like protein D [Beta vulgaris subsp. vulgaris]	0.840555	-0.250587	0.008269	down	yes	0.97	1.154	1.125	1.118	1.219	1	0.976	0.934	------	------	------	------	------	------	------	------	PF06094.9	GGACT	Gamma-glutamyl cyclotransferase, AIG2-like	peroxisomal	4	25	20.4	High
Metabolism	XP_010666599.1	PREDICTED: probable glucuronosyltransferase GUT1 [Beta vulgaris subsp. vulgaris]	0.84729	-0.239072	0.004012	down	yes	0.9693	1.144	1.181	1.134	1.117	1	0.926	0.982	BP:protein glycosylation;CC:trans-Golgi network;CC:endosome;MF:transferase activity, transferring glycosyl groups;	GO:0006486;GO:0005802;GO:0005768;GO:0016757	------	------	------	------	------	------	PF03016.12	Exostosin	Exostosin family	Golgi apparatus	2	3	55.3	High
Metabolism	XP_010673852.1	PREDICTED: 2-alkenal reductase (NADP(+)-dependent) [Beta vulgaris subsp. vulgaris]	0.83941	-0.252552	0.01063	down	yes	0.9393	1.119	1.07	1.152	1.135	1	0.919	0.899	------	------	------	------	------	------	COG2130	R:General function prediction only	PF00107.23;PF16884.2;PF13602.3	ADH_zinc_N;ADH_N_2;ADH_zinc_N_2	Zinc-binding dehydrogenase;N-terminal domain of oxidoreductase;Zinc-binding dehydrogenase	peroxisomal	6	17	44.4	High
Metabolism	XP_010689655.1	PREDICTED: phosphoinositide phospholipase C 2 [Beta vulgaris subsp. vulgaris]	0.841326	-0.249263	0.03043	down	yes	0.9263	1.101	1.036	1.168	1.098	1	0.884	0.895	------	------	K05857	PLCD	bvg00562;bvg04933;bvg04070	Inositol phosphate metabolism;AGE-RAGE signaling pathway in diabetic complications;Phosphatidylinositol signaling system	------	------	PF00388.16;PF00387.16;PF00168.27;PF09279.8	PI-PLC-X;PI-PLC-Y;C2;EF-hand_like	Phosphatidylinositol-specific phospholipase C, X domain;Phosphatidylinositol-specific phospholipase C, Y domain;C2 domain;Phosphoinositide-specific phospholipase C, efhand-like	mitochondrial	16	34	67	High
Metabolism	XP_010666644.1	PREDICTED: UDP-glucose:glycoprotein glucosyltransferase isoform X1 [Beta vulgaris subsp. vulgaris]	0.842477	-0.247291	0.01752	down	yes	0.9183	1.09	1.089	1.109	1.072	1	0.899	0.856	BP:protein glycosylation;MF:UDP-glucos;	GO:0006486;GO:0003980	K11718	HUGT	bvg04141	Protein processing in endoplasmic reticulum	------	------	PF06427.8;PF01501.17	UDP-g_GGTase;Glyco_transf_8	UDP-glucos;Glycosyl transferase family 8	ER	45	33	185	High
Metabolism	XP_010693825.1	PREDICTED: UDP-glycosyltransferase 87A2 [Beta vulgaris subsp. vulgaris]	1.20067	0.263843	0.03791	up	yes	1.071	0.892	0.922	0.875	0.879	1	1.03	1.183	------	------	------	------	------	------	------	------	PF00201.15	UDPGT	UDP-glucoronosyl and UDP-glucosyl transferase	cytoplasmic	13	32	53.1	High
Metabolism	XP_019102840.1	PREDICTED: probable 2-oxoglutarate-dependent dioxygenase AOP1 [Beta vulgaris subsp. vulgaris]	1.24119	0.311722	0.01869	up	yes	1.074	0.8653	0.852	0.856	0.888	1	1.045	1.178	MF:metal ion binding;MF:oxidoreductase activity;	GO:0046872;GO:0016491	------	------	------	------	------	------	PF03171.17;PF14226.3	2OG-FeII_Oxy;DIOX_N	2OG-F;non-haem dioxygenase in morphine synthesis N-terminal	peroxisomal	5	15	36.2	High
Metabolism	XP_010690450.1	PREDICTED: probable alkaline/neutral invertase B [Beta vulgaris subsp. vulgaris]	1.25983	0.333233	0.006299	up	yes	1.073	0.8517	0.888	0.84	0.827	1	1.127	1.091	------	------	------	------	------	------	------	------	PF12899.4	Glyco_hydro_100	Alkaline and neutral invertase	cytoplasmic	3	13	65.8	High
Metabolism	XP_010691166.1	PREDICTED: (R,S)-reticuline 7-O-methyltransferase-like [Beta vulgaris subsp. vulgaris]	1.30001	0.378525	0.02262	up	yes	1.082	0.8323	0.832	0.771	0.894	1	1.048	1.197	------	------	------	------	------	------	------	------	PF00891.15;PF08100.8	Methyltransf_2;Dimerisation	O-methyltransferase;Dimerisation domain	cytoplasmic	2	12	40.4	High
Metabolism	XP_010679876.1	PREDICTED: alcohol dehydrogenase 3 [Beta vulgaris subsp. vulgaris]	1.27492	0.350406	0.0203	up	yes	1.068	0.8377	0.779	0.91	0.824	1	1.043	1.162	------	------	K18857	ADH1	bvg00071;bvg00010;bvg00350;bvg00592	Fatty acid degradation;Glycolysis / Gluconeogenesis;Tyrosine metabolism;alpha-Linolenic acid metabolism	COG1062	C:Energy production and conversion	PF00107.23;PF08240.9;PF16912.2	ADH_zinc_N;ADH_N;Glu_dehyd_C	Zinc-binding dehydrogenase;Alcohol dehydrogenase GroES-like domain;Glucose dehydrogenase C-terminus	cytoplasmic	12	62	41.2	High
Metabolism	XP_010688057.1	PREDICTED: caffeic acid 3-O-methyltransferase [Beta vulgaris subsp. vulgaris]	1.20186	0.265264	0.009689	up	yes	1.036	0.862	0.897	0.798	0.891	1	1.066	1.041	------	------	K13066	E2.1.1.68, COMT	bvg00940	Phenylpropanoid biosynthesis	------	------	PF00891.15;PF08100.8	Methyltransf_2;Dimerisation	O-methyltransferase;Dimerisation domain	cytoplasmic	16	58	40.7	High
Metabolism	XP_010667128.2	PREDICTED: uncharacterized acetyltransferase At3g50280 [Beta vulgaris subsp. vulgaris]	1.23093	0.299752	0.004958	up	yes	1.041	0.8457	0.88	0.79	0.867	1	1.063	1.061	MF:transferase activity, transferring acyl groups other than amino-acyl groups;	GO:0016747	------	------	------	------	------	------	PF02458.12	Transferase	Transferase family	cytoplasmic	5	8	54.1	High
Metabolism	XP_010679475.1	PREDICTED: S-adenosylmethionine synthase 2 [Beta vulgaris subsp. vulgaris]	1.20375	0.267532	0.0157	up	yes	1.028	0.854	0.9	0.787	0.875	1	1.004	1.081	BP:S-adenosylmethionine biosynthetic process;BP:one-carbon metabolic process;CC:cytoplasm;MF:methionine adenosyltransferase activity;MF:metal ion binding;MF:ATP binding;	GO:0006556;GO:0006730;GO:0005737;GO:0004478;GO:0046872;GO:0005524	K00789	metK	bvg01230;bvg00270	Biosynthesis of amino acids;Cysteine and methionine metabolism	COG0192	H:Coenzyme transport and metabolism	PF02773.13;PF02772.13;PF00438.17	S-AdoMet_synt_C;S-AdoMet_synt_M;S-AdoMet_synt_N	S-adenosylmethionine synthetase, C-terminal domain;S-adenosylmethionine synthetase, central domain;S-adenosylmethionine synthetase, N-terminal domain	cytoplasmic	13	85	43	High
Metabolism	XP_010687851.1	PREDICTED: arogenate dehydrogenase 2, chloroplastic [Beta vulgaris subsp. vulgaris]	1.26506	0.339206	0.01979	up	yes	1.05	0.83	0.896	0.757	0.837	1	1.135	1.016	BP:tyrosine biosynthetic process;MF:prephenate dehydrogenas;MF:prephenate dehydrogenase activity;	GO:0006571;GO:0004665;GO:0008977	K15227	TYRAAT	bvg00400;bvg01230	Phenylalanine, tyrosine and tryptophan biosynthesis;Biosynthesis of amino acids	------	------	PF02153.14;PF03807.14;PF02826.16;PF03446.12	PDH;F420_oxidored;2-Hacid_dh_C;NAD_binding_2	Prephenate dehydrogenase;NADP oxidoreductase coenzyme F420-dependent;D-isomer specific 2-hydroxyacid dehydrogenase, NAD binding domain;NAD binding domain of 6-phosphogluconate dehydrogenase	chloroplast	2	5	44.3	High
Metabolism	XP_010688365.1	PREDICTED: acid phosphatase 1-like [Beta vulgaris subsp. vulgaris]	1.23004	0.2987	0.009322	up	yes	1.032	0.839	0.86	0.797	0.86	1	1.102	0.993	------	------	------	------	------	------	------	------	PF03767.11	Acid_phosphat_B	HAD superfamily, subfamily IIIB	Golgi apparatus	6	26	28	High
Metabolism	XP_010682786.1	PREDICTED: flavonoid 3',5'-methyltransferase [Beta vulgaris subsp. vulgaris]	1.25031	0.322284	0.004878	up	yes	1.014	0.811	0.846	0.754	0.833	1	1.056	0.985	------	------	K00588	E2.1.1.104	bvg00940;bvg00941;bvg00360;bvg00945	Phenylpropanoid biosynthesis;Flavonoid biosynthesis;Phenylalanine metabolism;Stilbenoid, diarylheptanoid and gingerol biosynthesis	COG4122	R:General function prediction only	PF01596.14;PF13578.3	Methyltransf_3;Methyltransf_24	O-methyltransferase;Methyltransferase domain	cytoplasmic	13	61	27	High
Metabolism	XP_010669584.1	PREDICTED: cytochrome P450 CYP73A100-like [Beta vulgaris subsp. vulgaris]	1.27952	0.355603	0.007	up	yes	1.024	0.8003	0.749	0.883	0.769	1	1.025	1.047	------	------	K00487	CYP73A	bvg00940;bvg00941;bvg00360;bvg00130;bvg00945	Phenylpropanoid biosynthesis;Flavonoid biosynthesis;Phenylalanine metabolism;Ubiquinone and other terpenoid-quinone biosynthesis;Stilbenoid, diarylheptanoid and gingerol biosynthesis	COG2124	Q:Secondary metabolites biosynthesis, transport and catabolism	PF00067.19	p450	Cytochrome P450	peroxisomal	3	8	62.6	High
Metabolism	XP_010687586.1	PREDICTED: phosphoinositide phosphatase SAC3 [Beta vulgaris subsp. vulgaris]	1.23088	0.299695	0.01308	up	yes	0.99	0.8043	0.802	0.732	0.879	1	0.97	1	------	------	------	------	------	------	COG5329	T:Signal transduction mechanisms	PF02383.15	Syja_N	SacI homology domain	peroxisomal	3	7	94.8	High
Metabolism	XP_010695409.1	PREDICTED: probable steroid-binding protein 3 [Beta vulgaris subsp. vulgaris]	1.22983	0.298454	0.02628	up	yes	0.983	0.7993	0.863	0.698	0.837	1	0.953	0.996	------	------	K17278	PGRMC1_2	------	------	------	------	PF00173.25	Cyt-b5	Cytochrome b5-like Heme/Steroid binding domain	ER	4	25	21.9	High
Metabolism	XP_010673288.1	PREDICTED: probable aldo-keto reductase 5 [Beta vulgaris subsp. vulgaris]	1.24673	0.318155	0.000171	up	yes	0.9833	0.7887	0.794	0.778	0.794	1	0.993	0.957	------	------	------	------	------	------	COG0667	C:Energy production and conversion	PF00248.18	Aldo_ket_red	Aldo/keto reductase family	mitochondrial	11	43	38.4	High
Metabolism	XP_010688910.1	PREDICTED: 1-aminocyclopropane-1-carboxylate oxidase 1 [Beta vulgaris subsp. vulgaris]	1.38545	0.470349	0.003188	up	yes	1.028	0.742	0.813	0.668	0.745	1	1.058	1.025	------	------	K05933	E1.14.17.4	bvg00270	Cysteine and methionine metabolism	COG3491	R:General function prediction only	PF03171.17;PF14226.3	2OG-FeII_Oxy;DIOX_N	2OG-F;non-haem dioxygenase in morphine synthesis N-terminal	cytoplasmic	12	57	36.4	High
Metabolism	XP_010666984.1	PREDICTED: oligosaccharyltransferase complex subunit ostc [Beta vulgaris subsp. vulgaris]	1.34426	0.426812	0.000971	up	yes	0.9473	0.7047	0.702	0.7	0.712	1	0.906	0.936	CC:integral component of membrane;	GO:0016021	------	------	------	------	------	------	PF04756.10	OST3_OST6	OST3 / OST6 family, transporter family	peroxisomal	2	13	19.3	High
Metabolism	XP_010690109.1	PREDICTED: 3-methyl-2-oxobutanoate hydroxymethyltransferase	0.635251	-0.654602	0.04048	down	yes	1.038	1.634	1.497	2.012	1.393	1	0.966	1.149	------	------	------	------	------	------	------	------	PF03080.12;PF14365.3	DUF239;DUF4409	Domain of unknown function;Domain of unknown function	cytoplasmic	2	4	41.8	High
Metabolism	XP_019105566.1	PREDICTED: GDSL esterase/lipase 7-like [Beta vulgaris subsp. vulgaris]	1.27928	0.355331	0.03226	up	yes	0.994	0.777	0.792	0.828	0.711	1	0.891	1.091	------	------	------	------	------	------	------	------	PF00657.19	Lipase_GDSL	GDSL-like Lipase/Acylhydrolase	extracellular	3	9	40.8	High
Metabolism	XP_010667958.1	PREDICTED: tRNA/rRNA methyltransferase [Beta vulgaris subsp. vulgaris]	0.814425	-0.296146	0.009543	down	yes	1.084	1.331	1.328	1.367	1.298	1	1.081	1.17	BP:RNA processing;MF:RNA methyltransferase activity;MF:RNA binding;	GO:0006396;GO:0008173;GO:0003723	------	------	------	------	COG0566	J:Translation, ribosomal structure and biogenesis	PF00588.16	SpoU_methylase	SpoU rRNA Methylase family	cytoplasmic	2	9	26.9	High
Metabolism	XP_010679443.1	PREDICTED: putative cyclase/dehydrase protein [Beta vulgaris subsp. vulgaris]	0.810024	-0.303963	0.008197	down	yes	1.002	1.237	1.212	1.321	1.177	1	1.039	0.966	------	------	------	------	------	------	COG5637	S:Function unknown	PF03364.17;PF10604.6	Polyketide_cyc;Polyketide_cyc2	Polyketide cyclase / dehydrase and lipid transport;Polyketide cyclase / dehydrase and lipid transport	chloroplast	3	11	32	High
Metabolism	XP_010672454.1	PREDICTED: 4-nitrophenylphosphatase [Beta vulgaris subsp. vulgaris]	0.840327	-0.250978	0.000164	down	yes	0.9773	1.163	1.149	1.166	1.174	1	0.967	0.965	------	------	------	------	------	------	COG0647	G:Carbohydrate transport and metabolism	PF13242.3;PF13344.3;PF13419.3;PF00702.23	Hydrolase_like;Hydrolase_6;HAD_2;Hydrolase	HAD-hyrolase-like;Haloacid dehalogenase-like hydrolase;Haloacid dehalogenase-like hydrolase;haloacid dehalogenase-like hydrolase	cytoplasmic	9	32	36.4	High
Metabolism	XP_010691187.1	PREDICTED: Beta-1,3-glucosyltransferase [Beta vulgaris subsp. vulgaris]	0.848087	-0.237716	0.04879	down	yes	0.9753	1.15	1.116	1.074	1.259	1	0.921	1.005	------	------	------	------	------	------	------	------	PF04646.9;PF02434.13	DUF604;Fringe	Protein of unknown function, DUF604;Fringe-like	ER	3	5	56.6	High
Metabolism	XP_010673692.1	PREDICTED: GDSL esterase/lipase At5g08460 [Beta vulgaris subsp. vulgaris]	0.844003	-0.244679	0.01751	down	yes	0.9993	1.184	1.179	1.259	1.114	1	0.961	1.037	------	------	------	------	------	------	------	------	PF00657.19	Lipase_GDSL	GDSL-like Lipase/Acylhydrolase	extracellular	3	10	38.9	High
Metabolism	XP_010683277.1	PREDICTED: protein PTST homolog 2, chloroplastic [Beta vulgaris subsp. vulgaris]	1.21328	0.278906	0.04469	up	yes	1.02	0.8407	0.874	0.924	0.724	1	1.009	1.051	------	------	------	------	------	------	------	------	PF16561.2	AMPK1_CBM	Glycogen recognition site of AMP-activated protein kinase	chloroplast	2	3	60.1	High
Metabolism	XP_010691026.1	PREDICTED: fibrinogen alpha-1 chain-like [Beta vulgaris subsp. vulgaris]	1.29688	0.375042	0.02376	up	yes	0.951	0.7333	0.777	0.624	0.799	1	0.907	0.946	------	------	------	------	------	------	------	------	PF02298.14	Cu_bind_like	Plastocyanin-like domain	ER	3	12	28.8	High
Metabolism	XP_019105379.1	PREDICTED: galactinol synthase 1 [Beta vulgaris subsp. vulgaris]	0.811424	-0.301472	0.009117	down	yes	1.037	1.278	1.35	1.194	1.291	1	1.03	1.08	BP:galactose metabolic process;MF:inositol 3-alpha-galactosyltransferase activity;	GO:0006012;GO:0047216	K18819	GOLS	bvg00052	Galactose metabolism	COG5597	M:Cell wall/membrane/envelope biogenesis	PF01501.17	Glyco_transf_8	Glycosyl transferase family 8	peroxisomal	5	22	38.9	High
Metabolism	XP_010671837.1	PREDICTED: short-chain dehydrogenase TIC 32, chloroplastic [Beta vulgaris subsp. vulgaris]	1.26085	0.334401	0.02483	up	yes	1.06	0.8407	0.876	0.881	0.765	1	1.021	1.159	------	------	------	------	------	------	COG1028;COG1028	Q:Secondary metabolites biosynthesis, transport and catabolism;I:Lipid transport and metabolism	PF00106.22;PF13561.3;PF08659.7	adh_short;adh_short_C2;KR	short chain dehydrogenase;Enoyl;KR domain	cytoplasmic	2	8	33.9	High
Metabolism	XP_010672068.1	PREDICTED: short-chain type dehydrogenase/reductase [Beta vulgaris subsp. vulgaris]	1.32467	0.405628	0.01387	up	yes	1.08	0.8153	0.885	0.745	0.816	1	1.072	1.168	------	------	K00059	fabG	bvg01212;bvg00061;bvg00780;bvg01040	Fatty acid metabolism;Fatty acid biosynthesis;Biotin metabolism;Biosynthesis of unsaturated fatty acids	COG1028;COG1028	Q:Secondary metabolites biosynthesis, transport and catabolism;I:Lipid transport and metabolism	PF13561.3;PF00106.22;PF08659.7	adh_short_C2;adh_short;KR	Enoyl;short chain dehydrogenase;KR domain	cytoplasmic	5	36	27.5	High
Metabolism	XP_010669790.1	PREDICTED: chalcone--flavonone isomerase [Beta vulgaris subsp. vulgaris]	1.23655	0.306324	0.01056	up	yes	1.023	0.8273	0.893	0.763	0.826	1	1.065	1.003	MF:intramolecular lyase activity;	GO:0016872	K01859	E5.5.1.6	bvg00941	Flavonoid biosynthesis	------	------	PF02431.12	Chalcone	Chalcone-flavanone isomerase	cytoplasmic	15	68	27.2	High
Metabolism	XP_010690854.1	PREDICTED: isoflavone reductase-like protein [Beta vulgaris subsp. vulgaris]	0.76779	-0.381216	0.000348	down	yes	1.025	1.335	1.297	1.33	1.378	1	1.025	1.049	------	------	------	------	------	------	------	------	PF05368.10;PF13460.3;PF01370.18;PF16363.2;PF03435.15;PF01073.16	NmrA;NAD_binding_10;Epimerase;GDP_Man_Dehyd;Sacchrp_dh_NADP;3Beta_HSD	NmrA-like family;NA;NAD dependent epimerase/dehydratase family;GDP-mannose 4,6 dehydratase;Saccharopine dehydrogenase NADP binding domain;3-beta hydroxysteroid dehydrogenase/isomerase family	cytoplasmic	14	45	36.9	High
Stress and defense	XP_010666809.1	PREDICTED: putative disease resistance protein RGA3 [Beta vulgaris subsp. vulgaris]	0.812547	-0.299477	0.006369	down	yes	1.088	1.339	1.336	1.309	1.372	1	1.119	1.144	MF:ADP binding;	GO:0043531	------	------	------	------	------	------	PF00931.19;PF13855.3	NB-ARC;LRR_8	NB-ARC domain;Leucine rich repeat	extracellular	4	4	132.2	High
Stress and defense	XP_010678536.1	PREDICTED: glutathione S-transferase U10 [Beta vulgaris subsp. vulgaris]	0.795715	-0.329676	0.01573	down	yes	1.04	1.307	1.221	1.42	1.279	1	1.023	1.098	------	------	K00799	GST, gst	bvg00480	Glutathione metabolism	------	------	PF13417.3;PF02798.17;PF13409.3	GST_N_3;GST_N;GST_N_2	Glutathione S-transferase, N-terminal domain;Glutathione S-transferase, N-terminal domain;Glutathione S-transferase, N-terminal domain	cytoplasmic	5	30	26	High
Stress and defense	XP_010670320.1	PREDICTED: hypersensitive-induced response protein 1 [Beta vulgaris subsp. vulgaris]	0.778875	-0.360536	0.006858	down	yes	1.025	1.316	1.218	1.404	1.326	1	1.017	1.059	------	------	------	------	------	------	------	------	PF01145.22	Band_7	SPFH domain / Band 7 family	cytoplasmic	6	48	31.3	High
Stress and defense	XP_010667563.1	PREDICTED: remorin [Beta vulgaris subsp. vulgaris]	0.705746	-0.502778	0.006666	down	yes	0.9457	1.34	1.295	1.47	1.254	1	0.873	0.964	------	------	------	------	------	------	------	------	PF03763.10	Remorin_C	Remorin, C-terminal region	cytoplasmic	10	41	23.2	High
Stress and defense	XP_019103297.1	PREDICTED: cysteine-rich repeat secretory protein 1-like [Beta vulgaris subsp. vulgaris]	0.809448	-0.30499	0.01918	down	yes	1.011	1.249	1.182	1.356	1.208	1	0.963	1.07	------	------	------	------	------	------	------	------	PF01657.14	Stress-antifung	Salt stress response/antifungal	ER	3	14	33.7	High
Stress and defense	XP_010679717.1	PREDICTED: germin-like protein 5-1 [Beta vulgaris subsp. vulgaris]	0.835237	-0.259743	0.02673	down	yes	1.024	1.226	1.135	1.262	1.281	1	0.975	1.097	------	------	------	------	------	------	------	------	PF00190.19;PF07883.8	Cupin_1;Cupin_2	Cupin;Cupin domain	extracellular	4	25	23.2	High
Stress and defense	XP_010666933.1	PREDICTED: heat shock 70 kDa protein 8 [Beta vulgaris subsp. vulgaris]	0.745674	-0.423383	0.002019	down	yes	0.9567	1.283	1.22	1.357	1.271	1	0.93	0.94	BP:response to heat;BP:response to high light intensity;BP:response to hydrogen peroxide;MF:ATP binding;	GO:0009408;GO:0009644;GO:0042542;GO:0005524	K09489	HSPA4	------	------	COG0443	O:Posttranslational modification, protein turnover, chaperones	PF00012.17;PF06723.10	HSP70;MreB_Mbl	Hsp70 protein;MreB/Mbl protein	cytoplasmic	3	7	62	High
Stress and defense	XP_010687737.1	PREDICTED: temperature-induced lipocalin-1 [Beta vulgaris subsp. vulgaris]	0.816993	-0.291604	0.03862	down	yes	1	1.224	1.166	1.37	1.135	1	1.001	0.999	------	------	K03098	APOD	------	------	COG3040	M:Cell wall/membrane/envelope biogenesis	PF08212.9;PF00061.20	Lipocalin_2;Lipocalin	Lipocalin-like domain;Lipocalin / cytosolic fatty-acid binding protein family	cytoplasmic	6	33	21.8	High
Stress and defense	XP_010675968.1	PREDICTED: RPM1-interacting protein 4 [Beta vulgaris subsp. vulgaris]	0.725739	-0.462478	0.01192	down	yes	0.9333	1.286	1.209	1.428	1.22	1	0.93	0.87	------	------	------	------	------	------	------	------	PF05627.8	AvrRpt-cleavage	Cleavage site for pathogenic type III effector avirulence factor Avr	cytoplasmic	2	25	8.4	High
Stress and defense	XP_010690412.1	PREDICTED: dirigent protein 23-like [Beta vulgaris subsp. vulgaris]	0.845118	-0.242776	0.0152	down	yes	1.004	1.188	1.162	1.275	1.127	1	1.018	0.993	------	------	------	------	------	------	------	------	PF03018.11	Dirigent	Dirigent-like protein	ER	4	26	23.4	High
Stress and defense	XP_010688590.1	PREDICTED: low-temperature-induced cysteine proteinase [Beta vulgaris subsp. vulgaris]	0.788152	-0.343453	0.001038	down	yes	0.9513	1.207	1.188	1.242	1.191	1	0.927	0.927	------	------	------	------	------	------	COG4870	O:Posttranslational modification, protein turnover, chaperones	PF00112.20;PF08246.9;PF00396.15	Peptidase_C1;Inhibitor_I29;Granulin	Papain family cysteine protease;Cathepsin propeptide inhibitor domain;Granulin	ER	6	17	51.3	High
Stress and defense	XP_010665534.1	PREDICTED: probable disease resistance protein At4g27220 isoform X1 [Beta vulgaris subsp. vulgaris]	0.836317	-0.257878	0.02508	down	yes	0.981	1.173	1.155	1.208	1.155	1	0.883	1.06	------	------	------	------	------	------	------	------	PF00931.19;PF13855.3;PF12799.4	NB-ARC;LRR_8;LRR_4	NB-ARC domain;Leucine rich repeat;Leucine Rich repeats	extracellular	9	9	113.8	High
Stress and defense	XP_010670321.1	PREDICTED: hypersensitive-induced response protein 1 [Beta vulgaris subsp. vulgaris]	0.807473	-0.308515	0.02079	down	yes	0.9617	1.191	1.175	1.299	1.098	1	0.933	0.952	------	------	------	------	------	------	------	------	PF01145.22	Band_7	SPFH domain / Band 7 family	cytoplasmic	5	72	31.5	High
Stress and defense	XP_010679082.1	PREDICTED: germin-like protein [Beta vulgaris subsp. vulgaris]	0.834876	-0.260367	0.04068	down	yes	0.9743	1.167	1.072	1.268	1.16	1	0.913	1.01	------	------	------	------	------	------	------	------	PF00190.19;PF07883.8	Cupin_1;Cupin_2	Cupin;Cupin domain	extracellular	2	19	23.9	High
Stress and defense	XP_010693326.1	PREDICTED: plant cysteine oxidase 2 [Beta vulgaris subsp. vulgaris]	1.21323	0.278854	0.007356	up	yes	1.06	0.8737	0.878	0.905	0.838	1	1.074	1.107	MF:oxidoreductase activity, acting on single donors with incorporation of molecular oxygen, incorporation of two atoms of oxygen;	GO:0016702	K10712	ADO	bvg00430	Taurine and hypotaurine metabolism	------	------	PF07847.9	DUF1637	Protein of unknown function	chloroplast	4	18	29.8	High
Stress and defense	XP_010679900.1	PREDICTED: L-ascorbate peroxidase 3, peroxisomal [Beta vulgaris subsp. vulgaris]	1.28429	0.360975	0.003591	up	yes	1.072	0.8347	0.82	0.822	0.862	1	1.115	1.101	------	------	K00434	E1.11.1.11	bvg00480;bvg00053	Glutathione metabolism;Ascorbate and aldarate metabolism	COG0376	P:Inorganic ion transport and metabolism	PF00141.20	peroxidase	Peroxidase	cytoplasmic	22	72	27.8	High
Stress and defense	XP_010684600.1	PREDICTED: major allergen Pru ar 1 [Beta vulgaris subsp. vulgaris]	1.21894	0.285631	0.01578	up	yes	1.045	0.8573	0.905	0.779	0.888	1	1.05	1.086	BP:defense response;BP:abscisic acid-activated signaling pathway;MF:signaling receptor activity;MF:protein phosphatase inhibitor activity;MF:abscisic acid binding;	GO:0006952;GO:0009738;GO:0038023;GO:0004864;GO:0010427	------	------	------	------	------	------	PF00407.16	Bet_v_1	Pathogenesis-related protein Bet v I family	vacuolar	2	75	17.9	High
Stress and defense	XP_010669785.1	PREDICTED: desiccation protectant protein Lea14 homolog [Beta vulgaris subsp. vulgaris]	1.27758	0.353409	0.01527	up	yes	1.054	0.825	0.918	0.763	0.794	1	1.105	1.056	------	------	------	------	------	------	------	------	PF03168.10	LEA_2	Late embryogenesis abundant protein	cytoplasmic	3	24	17.2	High
Stress and defense	XP_010687700.1	PREDICTED: peroxidase 57 [Beta vulgaris subsp. vulgaris]	1.20761	0.272154	0.000774	up	yes	1.022	0.8463	0.816	0.857	0.866	1	1.03	1.037	------	------	K00430	E1.11.1.7	bvg00940	Phenylpropanoid biosynthesis	------	------	PF00141.20	peroxidase	Peroxidase	ER	5	15	44.4	High
Stress and defense	XP_010694823.1	PREDICTED: probable glutathione S-transferase [Beta vulgaris subsp. vulgaris]	1.27073	0.345659	0.01174	up	yes	1.042	0.82	0.766	0.792	0.902	1	1.03	1.097	------	------	K00799	GST, gst	bvg00480	Glutathione metabolism	------	------	PF02798.17;PF13417.3;PF13410.3;PF13409.3;PF00043.22	GST_N;GST_N_3;GST_C_2;GST_N_2;GST_C	Glutathione S-transferase, N-terminal domain;Glutathione S-transferase, N-terminal domain;Glutathione S-transferase, C-terminal domain;Glutathione S-transferase, N-terminal domain;Glutathione S-transferase, C-terminal domain	peroxisomal	4	23	25.7	High
Stress and defense	XP_010684078.1	PREDICTED: glutathione S-transferase [Beta vulgaris subsp. vulgaris]	1.24683	0.318263	0.01306	up	yes	1.032	0.8277	0.88	0.753	0.85	1	1.089	1.006	------	------	K00799	GST, gst	bvg00480	Glutathione metabolism	COG0625	O:Posttranslational modification, protein turnover, chaperones	PF02798.17;PF00043.22;PF13417.3;PF13410.3;PF13409.3;PF14497.3	GST_N;GST_C;GST_N_3;GST_C_2;GST_N_2;GST_C_3	Glutathione S-transferase, N-terminal domain;Glutathione S-transferase, C-terminal domain;Glutathione S-transferase, N-terminal domain;Glutathione S-transferase, C-terminal domain;Glutathione S-transferase, N-terminal domain;Glutathione S-transferase, C-terminal domain	cytoplasmic	5	74	23.8	High
Stress and defense	NP_001290020.1	PREDICTED: non-symbiotic hemoglobin 1-like [Beta vulgaris subsp. vulgaris]	1.43346	0.519507	0.006574	up	yes	1.088	0.759	0.728	0.825	0.724	1	1.078	1.187	MF:oxygen transporter activity;MF:metal ion binding;MF:oxygen binding;MF:heme binding;	GO:0005344;GO:0046872;GO:0019825;GO:0020037	------	------	------	------	COG1018	C:Energy production and conversion	PF00042.19	Globin	Globin	cytoplasmic	8	50	19.2	High
Stress and defense	XP_019105636.1	PREDICTED: L-ascorbate peroxidase 5, peroxisomal-like [Beta vulgaris subsp. vulgaris]	1.22442	0.292093	0.04798	up	yes	1.011	0.8257	0.935	0.776	0.766	1	1.079	0.954	------	------	K00434	E1.11.1.11	bvg00480;bvg00053	Glutathione metabolism;Ascorbate and aldarate metabolism	COG0376	P:Inorganic ion transport and metabolism	PF00141.20	peroxidase	Peroxidase	cytoplasmic	2	11	32.8	High
Stress and defense	XP_010688720.1	PREDICTED: germin-like protein subfamily 1 member 15 [Beta vulgaris subsp. vulgaris]	1.23897	0.309142	0.02649	up	yes	1.011	0.816	0.887	0.716	0.845	1	1.058	0.976	------	------	------	------	------	------	------	------	PF00190.19;PF07883.8	Cupin_1;Cupin_2	Cupin;Cupin domain	extracellular	2	40	24.3	High
Stress and defense	XP_010671341.1	PREDICTED: acidic endochitinase SE2 [Beta vulgaris subsp. vulgaris]	1.21186	0.277228	0.04869	up	yes	1.001	0.826	0.791	0.777	0.91	1	1.082	0.922	BP:carbohydrate metabolic process;BP:polysaccharide catabolic process;BP:chitin catabolic process;CC:extracellular space;MF:hydrolase activity, hydrolyzing O-glycosyl compounds;MF:chitinase activity;	GO:0005975;GO:0000272;GO:0006032;GO:0005615;GO:0004553;GO:0004568	K01183	E3.2.1.14	bvg00520	Amino sugar and nucleotide sugar metabolism	------	------	PF00704.25	Glyco_hydro_18	Glycosyl hydrolases family 18	extracellular	5	15	30.7	High
Stress and defense	XP_010676510.1	PREDICTED: thaumatin-like protein 1 [Beta vulgaris subsp. vulgaris]	1.4	0.485427	0.01432	up	yes	1.057	0.755	0.774	0.661	0.83	1	1.164	1.008	------	------	------	------	------	------	------	------	PF00314.14	Thaumatin	Thaumatin family	ER	7	44	23.7	High
Stress and defense	XP_010676488.1	PREDICTED: remorin [Beta vulgaris subsp. vulgaris]	0.801242	-0.31969	0.01474	down	yes	0.903	1.127	1.149	1.152	1.081	1	0.838	0.871	------	------	------	------	------	------	------	------	PF03763.10;PF03766.10	Remorin_C;Remorin_N	Remorin, C-terminal region;Remorin, N-terminal region	cytoplasmic	16	65	22	High
Stress and defense	XP_010672478.1	PREDICTED: germin-like protein subfamily 1 member 17 [Beta vulgaris subsp. vulgaris]	1.30962	0.389151	0.001337	up	yes	0.9813	0.7493	0.736	0.761	0.751	1	1.018	0.926	------	------	------	------	------	------	------	------	PF00190.19;PF07883.8	Cupin_1;Cupin_2	Cupin;Cupin domain	extracellular	6	58	24.2	High
Stress and defense	XP_010673527.1	PREDICTED: metal tolerance protein 4 [Beta vulgaris subsp. vulgaris]	1.2499	0.321813	0.04295	up	yes	0.9433	0.7547	0.846	0.718	0.7	1	0.854	0.976	------	------	------	------	------	------	------	------	PF01545.18;PF16916.2	Cation_efflux;ZT_dimer	Cation efflux family;Dimerisation domain of Zinc Transporter	peroxisomal	2	6	45.5	High
Stress and defense	XP_010666949.1	PREDICTED: cysteine-rich repeat secretory protein 55 [Beta vulgaris subsp. vulgaris]	1.52606	0.609808	0.001946	up	yes	1.022	0.6697	0.761	0.641	0.607	1	1.048	1.018	------	------	------	------	------	------	------	------	PF01657.14	Stress-antifung	Salt stress response/antifungal	ER	2	30	29.3	High
Stress and defense	XP_010673900.1	PREDICTED: dirigent protein 22-like [Beta vulgaris subsp. vulgaris]	1.20612	0.270371	0.02418	up	yes	0.9187	0.7617	0.731	0.793	0.761	1	0.88	0.876	------	------	------	------	------	------	------	------	PF03018.11	Dirigent	Dirigent-like protein	vacuolar	3	15	22.6	High
Protein synthesis	XP_010689434.1	PREDICTED: ribosome-inactivating protein lychnin [Beta vulgaris subsp. vulgaris]	0.776187	-0.365524	0.0427	down	yes	1.03	1.327	1.251	1.524	1.207	1	1.017	1.072	------	------	------	------	------	------	------	------	PF00161.16	RIP	Ribosome inactivating protein	ER	18	52	33.9	High
Protein synthesis	XP_010675245.1	PREDICTED: eukaryotic translation initiation factor 3 subunit B [Beta vulgaris subsp. vulgaris]	0.833887	-0.262076	0.003062	down	yes	1.004	1.204	1.164	1.236	1.211	1	0.967	1.046	------	------	K03253	EIF3B	bvg03013	RNA transport	COG5354	J:Translation, ribosomal structure and biogenesis	PF08662.8;PF00076.19;PF12894.4	eIF2A;RRM_1;ANAPC4_WD40	Eukaryotic translation initiation factor eIF2A;RNA recognition motif.;Anaphase-promoting complex subunit 4 WD40 domain	cytoplasmic	9	25	82.3	High
Protein synthesis	XP_010666201.1	PREDICTED: 60S ribosomal protein L27-1 [Beta vulgaris subsp. vulgaris]	1.50474	0.589511	0.01632	up	yes	1.112	0.739	0.704	0.787	0.726	1	1.046	1.291	BP:translation;CC:ribosome;MF:structural constituent of ribosome;	GO:0006412;GO:0005840;GO:0003735	K02901	RP-L27e, RPL27	bvg03010	Ribosome	COG2163	J:Translation, ribosomal structure and biogenesis	PF01777.15	Ribosomal_L27e	Ribosomal L27e protein family	mitochondrial	3	40	15.6	High
Protein synthesis	XP_010669821.1	PREDICTED: 60S ribosomal protein L23A [Beta vulgaris subsp. vulgaris]	1.30524	0.384311	0.005906	up	yes	1.022	0.783	0.866	0.76	0.723	1	1.045	1.022	------	------	K02893	RP-L23Ae, RPL23A	bvg03010	Ribosome	COG0089	J:Translation, ribosomal structure and biogenesis	PF03939.10;PF00276.17	Ribosomal_L23eN;Ribosomal_L23	Ribosomal protein L23, N-terminal domain;Ribosomal protein L23	cytoplasmic	7	48	17.3	High
Protein synthesis	XP_010684349.1	PREDICTED: 60S ribosomal protein L18-2 [Beta vulgaris subsp. vulgaris]	1.24037	0.310769	0.006835	up	yes	0.982	0.7917	0.844	0.795	0.736	1	1.004	0.942	------	------	K02883	RP-L18e, RPL18	bvg03010	Ribosome	COG1727	J:Translation, ribosomal structure and biogenesis	PF17135.1	Ribosomal_L18	Ribosomal protein 60S L18 and 50S L18e	nuclear	3	43	21	High
Protein synthesis	XP_010680118.1	PREDICTED: 54S ribosomal protein L51, mitochondrial-like [Beta vulgaris subsp. vulgaris]	1.2987	0.377068	5e-06	up	yes	0.9987	0.769	0.772	0.779	0.756	1	1.001	0.995	------	------	K17424	MRPL43	------	------	------	------	PF05047.13	L51_S25_CI-B8	Mitochondrial ribosomal protein L51 / S25 / CI-B8 domain	mitochondrial	2	23	13.8	High
Protein synthesis	XP_010679050.1	PREDICTED: 40S ribosomal protein S24-1 [Beta vulgaris subsp. vulgaris]	1.27236	0.347505	0.01117	up	yes	0.9717	0.7637	0.821	0.683	0.787	1	0.985	0.93	------	------	K02974	RP-S24e, RPS24	bvg03010	Ribosome	COG2004	J:Translation, ribosomal structure and biogenesis	PF01282.16	Ribosomal_S24e	Ribosomal protein S24e	cytoplasmic	3	36	15.3	High
Protein synthesis	XP_010675861.1	PREDICTED: 40S ribosomal protein S8 [Beta vulgaris subsp. vulgaris]	1.33824	0.42034	0.02852	up	yes	0.9903	0.74	0.833	0.726	0.661	1	1.081	0.89	------	------	K02995	RP-S8e, RPS8	bvg03010	Ribosome	------	------	PF01201.19	Ribosomal_S8e	Ribosomal protein S8e	nuclear	4	48	24.6	High
Protein synthesis	XP_010688445.1	PREDICTED: ribosomal RNA processing protein 1 homolog [Beta vulgaris subsp. vulgaris]	1.4547	0.540724	0.007367	up	yes	1.01	0.6943	0.735	0.647	0.701	1	1.114	0.916	------	------	K14849	RRP1	------	------	------	------	PF05997.9	Nop52	Nucleolar protein,Nop52	nuclear	3	5	62	High
Protein synthesis	XP_010678774.1	PREDICTED: 50S ribosomal protein L12, chloroplastic-like [Beta vulgaris subsp. vulgaris]	0.842382	-0.247454	0.01549	down	yes	0.962	1.142	1.083	1.21	1.134	1	0.971	0.915	------	------	K02935	RP-L7, MRPL12, rplL	bvg03010	Ribosome	------	------	PF00542.16	Ribosomal_L12	Ribosomal protein L7/L12 C-terminal domain	mitochondrial	3	24	20.9	High
Protein synthesis	XP_010678079.1	PREDICTED: 50S ribosomal protein L15 [Beta vulgaris subsp. vulgaris]	1.20193	0.265352	0.008848	up	yes	0.972	0.8087	0.849	0.818	0.759	1	0.987	0.929	------	------	K02876	RP-L15, MRPL15, rplO	bvg03010	Ribosome	COG0200	J:Translation, ribosomal structure and biogenesis	PF00828.16	Ribosomal_L27A	Ribosomal proteins 50S-L15, 50S-L18e, 60S-L27A	mitochondrial	5	16	30.1	High
Protein synthesis	XP_010688875.1	PREDICTED: 50S ribosomal protein L7/L12-like [Beta vulgaris subsp. vulgaris]	1.42179	0.507703	0.002307	up	yes	0.9607	0.6757	0.708	0.665	0.654	1	0.885	0.997	------	------	K02935	RP-L7, MRPL12, rplL	bvg03010	Ribosome	COG0222	J:Translation, ribosomal structure and biogenesis	PF00542.16;PF16320.2	Ribosomal_L12;Ribosomal_L12_N	Ribosomal protein L7/L12 C-terminal domain;Ribosomal protein L7/L12 dimerisation domain	mitochondrial	2	9	20.5	High
Protein synthesis	XP_010695552.1	PREDICTED: RNA-binding protein 34 [Beta vulgaris subsp. vulgaris]	0.710813	-0.492458	0.03004	down	yes	0.8217	1.156	1.108	1.248	1.111	1	0.709	0.756	MF:RNA binding;	GO:0003723	K14837	NOP12	------	------	------	------	PF00076.19;PF16367.2	RRM_1;RRM_7	RNA recognition motif.;RNA recognition motif	nuclear	2	3	57.6	High
Photosynthesis	XP_010675575.1	PREDICTED: protein WEAK CHLOROPLAST MOVEMENT UNDER BLUE LIGHT 1-like isoform X1 [Beta vulgaris subsp. vulgaris]	0.807259	-0.308896	0.000571	down	yes	0.9897	1.226	1.236	1.259	1.182	1	0.991	0.978	------	------	------	------	------	------	------	------	PF05701.8	WEMBL	Weak chloroplast movement under blue light	nuclear	24	29	92.1	High
Photosynthesis	XP_010676092.1	PREDICTED: WEB family protein At5g55860 [Beta vulgaris subsp. vulgaris]	0.837863	-0.255213	0.001291	down	yes	0.9803	1.17	1.197	1.171	1.143	1	0.996	0.945	------	------	------	------	------	------	------	------	PF05701.8	WEMBL	Weak chloroplast movement under blue light	nuclear	11	18	73.7	High
Photosynthesis	XP_010671643.1	PREDICTED: ferric reduction oxidase 4-like [Beta vulgaris subsp. vulgaris]	1.24298	0.313802	0.002846	up	yes	1.018	0.819	0.774	0.854	0.829	1	1.056	0.997	------	------	------	------	------	------	------	------	PF08030.9;PF08022.9;PF01794.16	NAD_binding_6;FAD_binding_8;Ferric_reduct	Ferric reductase NAD binding domain;FAD-binding domain;Ferric reductase like transmembrane component	plasma membrane	3	5	79.9	High
Transcription related protein	XP_010673120.1	PREDICTED: transcription elongation factor SPT6 homolog isoform X1 [Beta vulgaris subsp. vulgaris]	0.815323	-0.294557	0.002028	down	yes	1.011	1.24	1.271	1.271	1.178	1	1.005	1.027	------	------	K11292	SUPT6H, SPT6	------	------	COG2183	K:Transcription	PF14633.3;PF14878.3;PF14635.3;PF14639.3;PF14641.3;PF14632.3;PF12836.4	SH2_2;DLD;HHH_7;YqgF;HTH_44;SPT6_acidic;HHH_3	SH2 domain;Death-like domain of SPT6;Helix-hairpin-helix motif;Holliday-junction resolvase-like of SPT6;Helix-turn-helix DNA-binding domain of SPT6;Acidic N-terminal SPT6;Helix-hairpin-helix motif	nuclear	12	7	185.9	High
Transcription related protein	XP_019105694.1	PREDICTED: probable mediator of RNA polymerase II transcription subunit 26c [Beta vulgaris subsp. vulgaris]	0.806683	-0.309926	0.001727	down	yes	0.9777	1.212	1.17	1.265	1.201	1	0.982	0.951	------	------	------	------	------	------	------	------	PF08711.8	Med26	TFIIS helical bundle-like domain	cytoplasmic	2	6	39.8	High
Transcription related protein	XP_010672436.1	PREDICTED: histone H2AX [Beta vulgaris subsp. vulgaris]	1.22046	0.287419	0.01893	up	yes	1.074	0.88	0.927	0.898	0.815	1	1.094	1.128	------	------	K11251	H2A	------	------	COG5262	B:Chromatin structure and dynamics	PF16211.2;PF00125.21	Histone_H2A_C;Histone	C-terminus of histone H2A;Core histone H2A/H2B/H3/H4	nuclear	2	28	14.8	High
Transcription related protein	XP_010696540.1	PREDICTED: telomere repeat-binding factor 4 [Beta vulgaris subsp. vulgaris]	1.21659	0.282843	0.005542	up	yes	1.056	0.868	0.905	0.847	0.852	1	1.071	1.098	------	------	K09422	MYBP	------	------	------	------	PF00249.28;PF00538.16;PF13921.3	Myb_DNA-binding;Linker_histone;Myb_DNA-bind_6	Myb-like DNA-binding domain;linker histone H1 and H5 family;Myb-like DNA-binding domain	cytoplasmic	3	10	30.4	High
Transcription related protein	XP_010668325.1	PREDICTED: histone H2A-beta, sperm [Beta vulgaris subsp. vulgaris]	1.20166	0.265028	0.02413	up	yes	0.985	0.8197	0.812	0.744	0.903	1	0.972	0.983	CC:nucleus;CC:nucleosome;MF:protein heterodimerization activity;MF:DNA binding;	GO:0005634;GO:0000786;GO:0046982;GO:0003677	K11251	H2A	------	------	COG5262	B:Chromatin structure and dynamics	PF16211.2;PF00125.21	Histone_H2A_C;Histone	C-terminus of histone H2A;Core histone H2A/H2B/H3/H4	nuclear	2	23	15.4	High
Transcription related protein	XP_010675876.1	PREDICTED: probable WRKY transcription factor 20 [Beta vulgaris subsp. vulgaris]	1.24578	0.317048	0.004048	up	yes	0.9813	0.7877	0.843	0.736	0.784	1	0.98	0.964	------	------	------	------	------	------	------	------	PF03106.12	WRKY	WRKY DNA -binding domain	cytoplasmic	3	4	68.4	High
Transcription related protein	XP_010695599.1	PREDICTED: histone H4 [Beta vulgaris subsp. vulgaris]	1.30458	0.383587	0.03062	up	yes	0.9937	0.7617	0.848	0.736	0.701	1	1.086	0.895	BP:COPII-coated vesicle budding;BP:intracellular protein transport;CC:endoplasmic reticulum membrane;CC:nucleus;CC:COPII vesicle coat;CC:nucleosome;CC:Golgi membrane;MF:protein heterodimerization activity;MF:DNA binding;MF:metal ion binding;	GO:0090114;GO:0006886;GO:0005789;GO:0005634;GO:0030127;GO:0000786;GO:0000139;GO:0046982;GO:0003677;GO:0046872	K11254	H4	------	------	COG2036	B:Chromatin structure and dynamics	PF15511.3	CENP-T_C	Centromere kinetochore component CENP-T histone fold	nuclear	6	51	11.4	High
Transcription related protein	XP_010690015.1	PREDICTED: splicing factor U2af small subunit B [Beta vulgaris subsp. vulgaris]	1.25681	0.329766	0.04158	up	yes	0.969	0.771	0.855	0.651	0.807	1	0.917	0.99	------	------	K12836	U2AF1	bvg03040	Spliceosome	------	------	PF00642.21;PF00076.19	zf-CCCH;RRM_1	Zinc finger C-x8-C-x5-C-x3-H type;RNA recognition motif.	nuclear	2	11	38.2	High
Transcription related protein	XP_010673587.1	PREDICTED: histone H3.2 [Beta vulgaris subsp. vulgaris]	1.27954	0.35562	0.02466	up	yes	0.926	0.7237	0.809	0.7	0.662	1	0.895	0.883	CC:nucleus;CC:chromocenter;CC:nucleosome;MF:DNA binding;MF:nucleosomal DNA binding;MF:protein heterodimerization activity;	GO:0005634;GO:0010369;GO:0000786;GO:0003677;GO:0031492;GO:0046982	K11253	H3	------	------	------	------	PF00125.21	Histone	Core histone H2A/H2B/H3/H4	nuclear	3	49	15.3	High
Transcription related protein	XP_010672876.1	PREDICTED: transcription initiation factor IIB-2 [Beta vulgaris subsp. vulgaris]	1.29263	0.370314	0.03948	up	yes	0.8967	0.6937	0.748	0.647	0.686	1	0.79	0.9	------	------	K03124	TFIIB, GTF2B, SUA7, tfb	bvg03022	Basal transcription factors	------	------	PF00382.16;PF08271.9	TFIIB;TF_Zn_Ribbon	Transcription factor TFIIB repeat;TFIIB zinc-binding	cytoplasmic	4	12	34.2	High
Transcription related protein	XP_010683996.1	PREDICTED: probable histone H2B.1 [Beta vulgaris subsp. vulgaris]	1.90897	0.932791	0.008595	up	yes	0.973	0.5097	0.624	0.484	0.421	1	1.088	0.831	------	------	K11252	H2B	------	------	------	------	PF00125.21	Histone	Core histone H2A/H2B/H3/H4	nuclear	2	59	15.4	High
Transcription related protein	XP_010694781.1	PREDICTED: AT-hook motif nuclear-localized protein 19 [Beta vulgaris subsp. vulgaris]	0.842845	-0.24666	0.007729	down	yes	1.019	1.209	1.218	1.261	1.147	1	1.057	1.001	BP:negative regulation of defense response to bacterium;BP:negative regulation of innate immune response;BP:defense response to bacterium;CC:nucleus;MF:transcription factor activity, sequence-specific DNA binding;MF:AT DNA binding;	GO:1900425;GO:0045824;GO:0042742;GO:0005634;GO:0003700;GO:0003680	------	------	------	------	------	------	PF03479.12	DUF296	Domain of unknown function	nuclear	2	10	31	High
Transcription related protein	XP_010687968.1	PREDICTED: Histone H4 transcription factor [Beta vulgaris subsp. vulgaris]	0.721583	-0.470763	0.02666	down	yes	1.003	1.39	1.369	1.588	1.212	1	0.955	1.055	------	------	------	------	------	------	------	------	PF15811.2	SVIP	Small VCP/p97-interacting protein	cytoplasmic	2	24	8.4	High
Transcription related protein	XP_010677473.1	PREDICTED: P-loop guanosine triphosphatase YjiA-like isoform X1 [Beta vulgaris subsp. vulgaris]	1.23337	0.302603	0.02934	up	yes	1.066	0.8643	0.882	0.806	0.905	1	1.028	1.171	------	------	------	------	------	------	COG0523	R:General function prediction only	PF02492.16;PF07683.11	cobW;CobW_C	CobW/HypB/UreG, nucleotide-binding domain;Cobalamin synthesis protein cobW C-terminal domain	mitochondrial	3	6	47.6	High
Transcription related protein	XP_010669775.1	PREDICTED: U4/U6 small nuclear ribonucleoprotein Prp3 isoform X1 [Beta vulgaris subsp. vulgaris]	0.814755	-0.295561	0.04143	down	yes	0.9663	1.186	1.15	1.312	1.095	1	1.003	0.896	BP:mRNA splicing, via spliceosome;CC:U4/U6 x U5 tri-snRNP complex;	GO:0000398;GO:0046540	K12843	PRPF3, PRP3	bvg03040	Spliceosome	------	------	PF08572.7;PF06544.9	PRP3;DUF1115	pre-mRNA processing factor 3;Protein of unknown function	nuclear	3	4	92.7	High
Transcription related protein	XP_010682579.1	PREDICTED: U4/U6 small nuclear ribonucleoprotein Prp31 homolog isoform X1 [Beta vulgaris subsp. vulgaris]	0.807828	-0.307879	0.009462	down	yes	0.9597	1.188	1.15	1.249	1.165	1	0.884	0.995	------	------	K12844	PRPF31	bvg03040	Spliceosome	------	------	PF01798.15;PF09785.6	Nop;Prp31_C	snoRNA binding domain, fibrillarin;Prp31 C terminal domain	nuclear	2	5	53.3	High
Transcription related protein	XP_010672936.1	PREDICTED: U4/U6 small nuclear ribonucleoprotein PRP4-like protein [Beta vulgaris subsp. vulgaris]	0.816073	-0.29323	0.006685	down	yes	0.9393	1.151	1.118	1.196	1.138	1	0.884	0.934	------	------	K12662	PRPF4, PRP4	bvg03040	Spliceosome	------	------	PF00400.29;PF12894.4;PF08799.8	WD40;ANAPC4_WD40;PRP4	WD domain, G-beta repeat;Anaphase-promoting complex subunit 4 WD40 domain;pre-mRNA processing factor 4	cytoplasmic	2	3	66	High
Protein folding and degradation	XP_010691955.1	PREDICTED: uric acid degradation bifunctional protein TTL isoform X2 [Beta vulgaris subsp. vulgaris]	0.721099	-0.471731	0.003956	down	yes	0.9843	1.365	1.246	1.434	1.414	1	0.94	1.013	------	------	K13484	TTHL	bvg00230	Purine metabolism	COG2351	F:Nucleotide transport and metabolism	PF00576.18;PF09349.7	Transthyretin;OHCU_decarbox	HIUase/Transthyretin family;OHCU decarboxylase	cytoplasmic	4	17	37	High
Protein folding and degradation	XP_010673905.1	PREDICTED: serine carboxypeptidase-like 20 [Beta vulgaris subsp. vulgaris]	0.735862	-0.442493	0.001286	down	yes	0.9603	1.305	1.272	1.381	1.263	1	0.941	0.94	------	------	K16296	SCPL-I	------	------	COG2939	E:Amino acid transport and metabolism	PF00450.19	Peptidase_S10	Serine carboxypeptidase	extracellular	3	10	57.6	High
Protein folding and degradation	XP_010679732.1	PREDICTED: epoxide hydrolase 4 [Beta vulgaris subsp. vulgaris]	0.824069	-0.279162	0.0104	down	yes	0.9963	1.209	1.221	1.256	1.149	1	1.054	0.935	------	------	------	------	------	------	COG0596	R:General function prediction only	PF00561.17;PF12697.4;PF12146.5	Abhydrolase_1;Abhydrolase_6;Hydrolase_4	alpha/beta hydrolase fold;Alpha/beta hydrolase family;Serine aminopeptidase, S33	peroxisomal	6	30	35.1	High
Protein folding and degradation	XP_010694132.1	PREDICTED: protein disulfide isomerase-like 1-3 [Beta vulgaris subsp. vulgaris]	0.834862	-0.26039	0.005635	down	yes	1.001	1.199	1.166	1.242	1.19	1	0.952	1.052	BP:cell redox homeostasis;BP:response to endoplasmic reticulum stress;CC:endoplasmic reticulum;CC:vacuolar membrane;CC:chloroplast;MF:protein disulfide isomerase activity;	GO:0045454;GO:0034976;GO:0005783;GO:0005774;GO:0009507;GO:0003756	K09580	PDIA1, P4HB	bvg04141	Protein processing in endoplasmic reticulum	COG0526	O:Posttranslational modification, protein turnover, chaperones	PF00085.17;PF13848.3;PF13899.3;PF04756.10;PF13098.3;PF00578.18;PF08534.7	Thioredoxin;Thioredoxin_6;Thioredoxin_7;OST3_OST6;Thioredoxin_2;AhpC-TSA;Redoxin	Thioredoxin;Thioredoxin-like domain;Thioredoxin-like;OST3 / OST6 family, transporter family;Thioredoxin-like domain;AhpC/TSA family;Redoxin	ER	23	45	64.6	High
Protein folding and degradation	XP_010688897.1	PREDICTED: 3-hydroxyisobutyryl-CoA hydrolase-like protein 5 [Beta vulgaris subsp. vulgaris]	0.829555	-0.26959	0.000273	down	yes	0.988	1.191	1.188	1.177	1.209	1	0.96	1.004	------	------	K05605	HIBCH	bvg01200;bvg00640;bvg00410;bvg00280	Carbon metabolism;Propanoate metabolism;beta-Alanine metabolism;Valine, leucine and isoleucine degradation	COG1024	I:Lipid transport and metabolism	PF16113.2;PF00378.17	ECH_2;ECH_1	Enoyl-CoA hydratase/isomerase;Enoyl-CoA hydratase/isomerase	peroxisomal	14	44	42.8	High
Protein folding and degradation	XP_010685108.1	PREDICTED: peptidyl-prolyl cis-trans isomerase FKBP62 [Beta vulgaris subsp. vulgaris]	0.691641	-0.531905	0.009485	down	yes	0.8853	1.28	1.222	1.394	1.223	1	0.787	0.869	MF:peptidyl-prolyl cis-trans isomerase activity;	GO:0003755	K09571	FKBP4_5	------	------	COG0545	O:Posttranslational modification, protein turnover, chaperones	PF00254.25;PF00515.25;PF07719.14;PF13181.3;PF14559.3	FKBP_C;TPR_1;TPR_2;TPR_8;TPR_19	FKBP-type peptidyl-prolyl cis-trans isomerase;Tetratricopeptide repeat;Tetratricopeptide repeat;Tetratricopeptide repeat;Tetratricopeptide repeat	cytoplasmic	29	39	61.2	High
Protein folding and degradation	XP_010666922.1	PREDICTED: probable 26S proteasome non-ATPase regulatory subunit 3 [Beta vulgaris subsp. vulgaris]	0.823882	-0.279491	0.006537	down	yes	0.9763	1.185	1.138	1.233	1.184	1	0.918	1.011	BP:regulation of protein catabolic process;CC:proteasome complex;MF:enzyme regulator activity;	GO:0042176;GO:0000502;GO:0030234	K03033	PSMD3, RPN3	bvg03050	Proteasome	------	------	PF08375.8;PF01399.24	Rpn3_C;PCI	Proteasome regulatory subunit C-terminal;PCI domain	nuclear	24	57	55.2	High
Protein folding and degradation	XP_010695194.1	PREDICTED: chaperone protein ClpB1 isoform X1 [Beta vulgaris subsp. vulgaris]	0.834471	-0.261066	0.01751	down	yes	0.978	1.172	1.081	1.241	1.194	1	0.984	0.95	------	------	K03695	clpB	------	------	COG0542	O:Posttranslational modification, protein turnover, chaperones	PF07724.11;PF00004.26;PF10431.6;PF07728.11;PF02861.17;PF13191.3;PF13401.3;PF00158.23;PF01695.14	AAA_2;AAA;ClpB_D2-small;AAA_5;Clp_N;AAA_16;AAA_22;Sigma54_activat;IstB_IS21	AAA domain;ATPase family associated with various cellular activities;C-terminal, D2-small domain, of ClpB protein;AAA domain;Clp amino terminal domain, pathogenicity island component;AAA ATPase domain;AAA domain;Sigma-54 interaction domain;IstB-like ATP binding protein	nuclear	24	35	100.7	High
Protein folding and degradation	XP_010680235.1	PREDICTED: probable inactive ATP-dependent zinc metalloprotease FTSHI 4, chloroplastic [Beta vulgaris subsp. vulgaris]	0.795527	-0.330016	0.01683	down	yes	0.9427	1.185	1.24	1.157	1.158	1	0.833	0.995	------	------	------	------	------	------	COG0465	O:Posttranslational modification, protein turnover, chaperones	PF00004.26;PF05496.9	AAA;RuvB_N	ATPase family associated with various cellular activities;Holliday junction DNA helicase ruvB N-terminus	chloroplast	2	2	97.4	High
Protein folding and degradation	XP_010682202.1	PREDICTED: T-complex protein 1 subunit alpha [Beta vulgaris subsp. vulgaris]	0.823934	-0.2794	0.005134	down	yes	0.9467	1.149	1.15	1.19	1.107	1	0.909	0.931	------	------	K09493	CCT1, TCP1	------	------	COG0459	O:Posttranslational modification, protein turnover, chaperones	PF00118.21	Cpn60_TCP1	TCP-1/cpn60 chaperonin family	cytoplasmic	21	43	58.6	High
Protein folding and degradation	XP_010672252.1	PREDICTED: F-box protein SKIP16 [Beta vulgaris subsp. vulgaris]	1.23281	0.301951	0.003271	up	yes	1.022	0.829	0.832	0.809	0.846	1	1.079	0.987	------	------	K10290	FBXO3	------	------	COG2967	P:Inorganic ion transport and metabolism	PF04379.11	DUF525	Protein of unknown function	cytoplasmic	5	14	48.8	High
Protein folding and degradation	XP_010693769.1	PREDICTED: mitochondrial intermembrane space import and assembly protein 40 homolog [Beta vulgaris subsp. vulgaris]	1.30242	0.381195	0.002289	up	yes	1.028	0.7893	0.816	0.775	0.777	1	0.992	1.091	------	------	K17782	MIA40, CHCHD4	------	------	------	------	PF06747.10	CHCH	CHCH domain	cytoplasmic	2	17	15.3	High
Protein folding and degradation	XP_010688664.1	PREDICTED: E3 ubiquitin ligase BIG BROTHER-related-like isoform X1 [Beta vulgaris subsp. vulgaris]	1.37304	0.45737	0.006422	up	yes	1.049	0.764	0.828	0.747	0.717	1	1.011	1.135	------	------	K19045	BB	------	------	------	------	PF13639.3;PF13923.3;PF17123.2;PF12678.4;PF00097.22;PF14634.3;PF13920.3	zf-RING_2;zf-C3HC4_2;zf-RING_11;zf-rbx1;zf-C3HC4;zf-RING_5;zf-C3HC4_3	Ring finger domain;Zinc finger, C3HC4 type;RING-like zinc finger;RING-H2 zinc finger domain;Zinc finger, C3HC4 type;zinc-RING finger domain;Zinc finger, C3HC4 type	cytoplasmic	2	7	36.4	High
Protein folding and degradation	XP_010683242.1	PREDICTED: ubiquitin-conjugating enzyme E2 2 [Beta vulgaris subsp. vulgaris]	1.31352	0.393439	0.01934	up	yes	1.021	0.7773	0.831	0.774	0.727	1	1.129	0.935	BP:DNA repair;BP:proteasome-mediated ubiquitin-dependent protein catabolic process;BP:protein polyubiquitination;CC:nucleus;MF:sequence-specific DNA binding;MF:transcription factor activity, sequence-specific DNA binding;MF:ubiquitin conjugating enzyme activity;MF:transferase activity;MF:ATP binding;	GO:0006281;GO:0043161;GO:0000209;GO:0005634;GO:0043565;GO:0003700;GO:0061631;GO:0016740;GO:0005524	K10573	UBE2A, UBC2, RAD6A	bvg04120	Ubiquitin mediated proteolysis	COG5078	O:Posttranslational modification, protein turnover, chaperones	PF00179.23	UQ_con	Ubiquitin-conjugating enzyme	mitochondrial	2	18	17.3	High
Signaling transduction	XP_010666401.1	PREDICTED: calcineurin B-like protein 4 [Beta vulgaris subsp. vulgaris]	0.72969	-0.454645	0.04098	down	yes	0.988	1.354	1.183	1.289	1.589	1	0.952	1.012	------	------	K06268	PPP3R, CNB	------	------	COG5126;COG5126;COG5126	D:Cell cycle control, cell division, chromosome partitioning;Z:Cytoskeleton;T:Signal transduction mechanisms	PF00036.29;PF13405.3;PF13202.3;PF13499.3;PF13833.3	EF-hand_1;EF-hand_6;EF-hand_5;EF-hand_7;EF-hand_8	EF hand;EF-hand domain;EF hand;EF-hand domain pair;EF-hand domain pair	cytoplasmic	2	9	25.3	High
Signaling transduction	XP_019105862.1	PREDICTED: phosphatidylinositol 4-phosphate 5-kinase 8 isoform X1 [Beta vulgaris subsp. vulgaris]	0.750195	-0.414663	0.000751	down	yes	0.964	1.285	1.233	1.315	1.307	1	0.922	0.97	------	------	------	------	------	------	COG5253	T:Signal transduction mechanisms	PF01504.15;PF02493.17	PIP5K;MORN	Phosphatidylinositol-4-phosphate 5-Kinase;MORN repeat	cytoplasmic	2	2	90.7	High
Signaling transduction	XP_010682075.1	PREDICTED: probable leucine-rich repeat receptor-like protein kinase At5g49770 isoform X1 [Beta vulgaris subsp. vulgaris]	0.836228	-0.258031	0.01308	down	yes	1.011	1.209	1.191	1.221	1.216	1	0.938	1.095	------	------	------	------	------	------	------	------	PF00069.22;PF07714.14;PF13855.3	Pkinase;Pkinase_Tyr;LRR_8	Protein kinase domain;Protein tyrosine kinase;Leucine rich repeat	ER	23	27	105.1	High
Signaling transduction	XP_010679675.1	PREDICTED: inactive LRR receptor-like serine/threonine-protein kinase BIR2 [Beta vulgaris subsp. vulgaris]	0.795673	-0.329752	0.02264	down	yes	0.9747	1.225	1.091	1.299	1.284	1	0.984	0.94	------	------	------	------	------	------	COG4886	S:Function unknown	PF13855.3;PF12799.4;PF00560.30	LRR_8;LRR_4;LRR_1	Leucine rich repeat;Leucine Rich repeats;Leucine Rich Repeat	cytoplasmic	2	7	30.9	High
Signaling transduction	XP_010676297.1	PREDICTED: long chain acyl-CoA synthetase 4 [Beta vulgaris subsp. vulgaris]	0.82819	-0.271966	0.02584	down	yes	0.993	1.199	1.112	1.312	1.174	1	0.977	1.002	------	------	K01897	ACSL, fadD	bvg00071;bvg00061;bvg04146;bvg01212	Fatty acid degradation;Fatty acid biosynthesis;Peroxisome;Fatty acid metabolism	COG1022	I:Lipid transport and metabolism	PF00501.25	AMP-binding	AMP-binding enzyme	cytoplasmic	29	51	73.7	High
Signaling transduction	XP_010688889.1	PREDICTED: probable receptor-like protein kinase At2g42960 [Beta vulgaris subsp. vulgaris]	0.782719	-0.353433	0.03294	down	yes	0.9557	1.221	1.118	1.375	1.169	1	0.958	0.909	------	------	------	------	------	------	COG0515	T:Signal transduction mechanisms	PF00069.22;PF07714.14	Pkinase;Pkinase_Tyr	Protein kinase domain;Protein tyrosine kinase	ER	2	4	56.9	High
Signaling transduction	XP_019104847.1	PREDICTED: protein SRC1 [Beta vulgaris subsp. vulgaris]	0.821048	-0.284461	0.03773	down	yes	0.9713	1.183	1.087	1.256	1.207	1	1.036	0.878	------	------	------	------	------	------	------	------	------	------	------	nuclear	2	21	11.2	High
Signaling transduction	XP_010675716.1	PREDICTED: calcium-dependent protein kinase 33 [Beta vulgaris subsp. vulgaris]	0.830881	-0.267286	0.000517	down	yes	0.9713	1.169	1.165	1.187	1.156	1	0.973	0.941	------	------	K13412	CPK	bvg04626	Plant-pathogen interaction	------	------	PF00069.22;PF00036.29;PF07714.14;PF13499.3;PF13405.3;PF13202.3;PF13833.3;PF10591.6;PF12763.4;PF14531.3	Pkinase;EF-hand_1;Pkinase_Tyr;EF-hand_7;EF-hand_6;EF-hand_5;EF-hand_8;SPARC_Ca_bdg;EF-hand_4;Kinase-like	Protein kinase domain;EF hand;Protein tyrosine kinase;EF-hand domain pair;EF-hand domain;EF hand;EF-hand domain pair;Secreted protein acidic and rich in cysteine Ca binding region;Cytoskeletal-regulatory complex EF hand;Kinase-like	cytoplasmic	21	48	60.2	High
Signaling transduction	XP_010667986.1	PREDICTED: 23 kDa jasmonate-induced protein [Beta vulgaris subsp. vulgaris]	0.781234	-0.356173	0.03949	down	yes	0.9367	1.199	1.327	1.1	1.17	1	0.826	0.984	------	------	------	------	------	------	------	------	------	------	------	cytoplasmic	5	26	24.2	High
Signaling transduction	XP_010678598.1	PREDICTED: calcium-dependent protein kinase 10 [Beta vulgaris subsp. vulgaris]	0.742007	-0.430496	0.0117	down	yes	0.9097	1.226	1.195	1.334	1.148	1	0.866	0.863	------	------	K13412	CPK	bvg04626	Plant-pathogen interaction	------	------	PF00069.22;PF00036.29;PF07714.14;PF13499.3;PF13405.3;PF13833.3;PF13202.3;PF12763.4;PF06293.11;PF14531.3	Pkinase;EF-hand_1;Pkinase_Tyr;EF-hand_7;EF-hand_6;EF-hand_8;EF-hand_5;EF-hand_4;Kdo;Kinase-like	Protein kinase domain;EF hand;Protein tyrosine kinase;EF-hand domain pair;EF-hand domain;EF-hand domain pair;EF hand;Cytoskeletal-regulatory complex EF hand;Lipopolysaccharide kinase;Kinase-like	cytoplasmic	4	9	61.5	High
Signaling transduction	XP_010676916.1	PREDICTED: protein GPR107 [Beta vulgaris subsp. vulgaris]	0.760783	-0.394444	0.004962	down	yes	0.9137	1.201	1.172	1.255	1.176	1	0.861	0.88	------	------	------	------	------	------	------	------	PF06814.10;PF10192.6	Lung_7-TM_R;GpcrRhopsn4	Lung seven transmembrane receptor;Rhodopsin-like GPCR transmembrane domain	ER	4	10	50.7	High
Signaling transduction	XP_010676024.1	PREDICTED: 14-3-3-like protein [Beta vulgaris subsp. vulgaris]	0.825285	-0.277035	0.003131	down	yes	0.94	1.139	1.13	1.156	1.13	1	0.909	0.911	------	------	K06630	YWHAE	------	------	COG5040	T:Signal transduction mechanisms	PF00244.17	14-3-3	14-3-3 protein	cytoplasmic	10	61	29.4	High
Signaling transduction	XP_019107270.1	PREDICTED: calmodulin-7-like [Beta vulgaris subsp. vulgaris]	0.831413	-0.266363	0.008644	down	yes	0.9237	1.111	1.103	1.128	1.103	1	0.883	0.888	------	------	K02183	CALM	bvg04016;bvg04626;bvg04070	MAPK signaling pathway - plant;Plant-pathogen interaction;Phosphatidylinositol signaling system	COG5126;COG5126;COG5126	D:Cell cycle control, cell division, chromosome partitioning;Z:Cytoskeleton;T:Signal transduction mechanisms	PF00036.29;PF13499.3;PF13833.3;PF13405.3;PF13202.3;PF14658.3;PF12763.4;PF10591.6;PF08976.8	EF-hand_1;EF-hand_7;EF-hand_8;EF-hand_6;EF-hand_5;EF-hand_9;EF-hand_4;SPARC_Ca_bdg;EF-hand_11	EF hand;EF-hand domain pair;EF-hand domain pair;EF-hand domain;EF hand;EF-hand domain;Cytoskeletal-regulatory complex EF hand;Secreted protein acidic and rich in cysteine Ca binding region;EF-hand domain	cytoplasmic	12	70	21.3	High
Signaling transduction	XP_010685051.1	PREDICTED: B-cell receptor-associated protein 31 [Beta vulgaris subsp. vulgaris]	1.20992	0.274917	0.03227	up	yes	1.068	0.8827	0.875	0.907	0.866	1	1.18	1.025	------	------	K14009	BCAP31, BAP31	bvg04141	Protein processing in endoplasmic reticulum	------	------	PF05529.9;PF04111.9	Bap31;APG6	B-cell receptor-associated protein 31-like;Autophagy protein Apg6	ER	6	29	24.5	High
Signaling transduction	XP_010685730.1	PREDICTED: scarecrow-like protein 34 [Beta vulgaris subsp. vulgaris]	1.22055	0.287533	0.01786	up	yes	1.031	0.8447	0.801	0.919	0.814	1	1.092	1.002	------	------	------	------	------	------	------	------	PF03514.11	GRAS	GRAS domain family	cytoplasmic	2	2	77.4	High
Signaling transduction	XP_010666297.1	PREDICTED: auxin-binding protein ABP19b [Beta vulgaris subsp. vulgaris]	1.21002	0.275026	0.005045	up	yes	1.01	0.8347	0.865	0.8	0.839	1	1.057	0.972	CC:extracellular region;MF:manganese ion binding;MF:nutrient reservoir activity;	GO:0005576;GO:0030145;GO:0045735	------	------	------	------	------	------	PF00190.19;PF07883.8	Cupin_1;Cupin_2	Cupin;Cupin domain	vacuolar	5	33	22.5	High
Signaling transduction	XP_010683657.1	PREDICTED: protein SRG1 [Beta vulgaris subsp. vulgaris]	1.34451	0.427076	0.02238	up	yes	1.051	0.7817	0.885	0.654	0.806	1	1.107	1.047	------	------	------	------	------	------	------	------	PF14226.3;PF03171.17	DIOX_N;2OG-FeII_Oxy	non-haem dioxygenase in morphine synthesis N-terminal;2OG-F	cytoplasmic	4	29	39.2	High
Signaling transduction	XP_010690303.1	PREDICTED: serine/threonine-protein kinase STY46 [Beta vulgaris subsp. vulgaris]	1.20218	0.265652	0.01808	up	yes	0.993	0.826	0.865	0.808	0.805	1	1.056	0.923	------	------	------	------	------	------	COG0515	T:Signal transduction mechanisms	PF07714.14;PF00069.22;PF01842.22	Pkinase_Tyr;Pkinase;ACT	Protein tyrosine kinase;Protein kinase domain;ACT domain	cytoplasmic	8	17	65.1	High
Signaling transduction	XP_010687109.1	PREDICTED: CBL-interacting serine/threonine-protein kinase 23 [Beta vulgaris subsp. vulgaris]	1.28679	0.363773	0.01899	up	yes	0.9943	0.7727	0.81	0.773	0.735	1	1.085	0.898	------	------	------	------	------	------	COG0515	T:Signal transduction mechanisms	PF00069.22;PF07714.14;PF03822.11;PF14531.3	Pkinase;Pkinase_Tyr;NAF;Kinase-like	Protein kinase domain;Protein tyrosine kinase;NAF domain;Kinase-like	cytoplasmic	4	14	51.5	High
Signaling transduction	XP_010694749.1	PREDICTED: mitogen-activated protein kinase 19 [Beta vulgaris subsp. vulgaris]	1.27146	0.346487	0.007048	up	yes	0.9583	0.7537	0.742	0.754	0.765	1	0.996	0.879	MF:ATP binding;MF:protein kinase activity;	GO:0005524;GO:0004672	------	------	------	------	------	------	PF00069.22;PF07714.14;PF06293.11	Pkinase;Pkinase_Tyr;Kdo	Protein kinase domain;Protein tyrosine kinase;Lipopolysaccharide kinase	cytoplasmic	2	9	68.7	High
Signaling transduction	XP_010666551.1	PREDICTED:probable cyclin-dependent serine/threonine-protein kinase DDB_G0292550 [Beta vulgaris subsp. vulgaris]	1.31725	0.397525	0.000424	up	yes	0.9853	0.748	0.75	0.711	0.783	1	0.977	0.979	------	------	------	------	------	------	------	------	------	------	------	cytoplasmic	2	1	187	High
Signaling transduction	XP_010668434.1	PREDICTED: ultraviolet-B receptor UVR8 [Beta vulgaris subsp. vulgaris]	0.834568	-0.260899	0.001658	down	yes	1.014	1.215	1.245	1.164	1.236	1	1.022	1.021	------	------	------	------	------	------	COG5184;COG5184	D:Cell cycle control, cell division, chromosome partitioning;Z:Cytoskeleton	PF00415.15;PF13540.3	RCC1;RCC1_2	Regulator of chromosome condensation;Regulator of chromosome condensation	cytoplasmic	4	11	62.3	High
Transport related protein	XP_010686722.1	PREDICTED: fibrous sheath CABYR-binding protein [Beta vulgaris subsp. vulgaris]	0.82973	-0.269287	0.01132	down	yes	0.921	1.11	1.119	1.13	1.081	1	0.891	0.872	------	------	------	------	------	------	------	------	------	------	------	cytoplasmic	6	49	16.1	High
Transport related protein	XP_010688172.1	PREDICTED: probable sulfate transporter 3.5 [Beta vulgaris subsp. vulgaris]	0.411415	-1.28133	0.00489	down	yes	1.038	2.523	2.023	2.914	2.631	1	1.041	1.072	------	------	K17471	SULTR3	------	------	COG0659	P:Inorganic ion transport and metabolism	PF00916.17;PF01740.18	Sulfate_transp;STAS	Sulfate permease family;STAS domain	cytoplasmic	2	4	70.6	High
Transport related protein	XP_010671214.1	PREDICTED: probable inorganic phosphate transporter 1-3 [Beta vulgaris subsp. vulgaris]	0.571748	-0.80655	0.000925	down	yes	1.024	1.791	1.636	1.934	1.802	1	1.028	1.045	------	------	K08176	PHO84	------	------	------	------	PF00083.21;PF07690.13	Sugar_tr;MFS_1	Sugar;Major Facilitator Superfamily	peroxisomal	3	18	58.6	High
Transport related protein	XP_010687477.1	PREDICTED: sulfate transporter 1.2 [Beta vulgaris subsp. vulgaris]	0.608437	-0.716819	0.01134	down	yes	1.024	1.683	1.569	1.962	1.519	1	1.119	0.952	------	------	K17470	SULTR1	------	------	COG0659	P:Inorganic ion transport and metabolism	PF00916.17;PF01740.18	Sulfate_transp;STAS	Sulfate permease family;STAS domain	cytoplasmic	6	11	71.9	High
Transport related protein	XP_010676154.1	PREDICTED: protein NRT1/ PTR FAMILY 6.3 [Beta vulgaris subsp. vulgaris]	0.603027	-0.729707	0.003381	down	yes	0.9763	1.619	1.468	1.589	1.799	1	0.906	1.023	------	------	K14638	SLC15A3_4, PHT	------	------	COG3104	E:Amino acid transport and metabolism	PF00854.18	PTR2	POT family	cytoplasmic	2	4	66.3	High
Transport related protein	XP_010678053.1	PREDICTED: cation/H(+) antiporter 20 [Beta vulgaris subsp. vulgaris]	0.644728	-0.633236	1.6e-05	down	yes	1.009	1.565	1.521	1.581	1.592	1	1.013	1.014	CC:integral component of membrane;MF:solut;	GO:0016021;GO:0015299	------	------	------	------	COG0475	P:Inorganic ion transport and metabolism	PF00999.18	Na_H_Exchanger	Sodium/hydrogen exchanger family	Golgi apparatus	12	15	91.8	High
Transport related protein	XP_010695819.1	PREDICTED: high affinity nitrate transporter 2.5-like [Beta vulgaris subsp. vulgaris]	0.647894	-0.626171	0.003118	down	yes	0.9997	1.543	1.471	1.711	1.448	1	0.974	1.025	BP:transmembrane transport;CC:integral component of membrane;	GO:0055085;GO:0016021	K02575	NRT, narK, nrtP, nasA	bvg00910	Nitrogen metabolism	COG2223	P:Inorganic ion transport and metabolism	PF07690.13	MFS_1	Major Facilitator Superfamily	peroxisomal	6	16	54.7	High
Transport related protein	XP_010682931.1	PREDICTED: transmembrane 9 superfamily member 1 [Beta vulgaris subsp. vulgaris]	0.757994	-0.399741	0.0206	down	yes	1.043	1.376	1.271	1.533	1.325	1	1.125	1.003	------	------	K17087	TM9SF3	------	------	------	------	PF02990.13	EMP70	Endomembrane protein 70	plasma membrane	3	10	67.3	High
Transport related protein	XP_010685328.1	PREDICTED: high-affinity nitrate transporter 2.1 [Beta vulgaris subsp. vulgaris]	0.797308	-0.326791	0.01699	down	yes	1.007	1.263	1.341	1.3	1.149	1	0.961	1.06	------	------	K02575	NRT, narK, nrtP, nasA	bvg00910	Nitrogen metabolism	------	------	PF07690.13	MFS_1	Major Facilitator Superfamily	peroxisomal	5	17	56.4	High
Transport related protein	XP_010694071.1	PREDICTED: protein TRIGALACTOSYLDIACYLGLYCEROL 4, chloroplastic [Beta vulgaris subsp. vulgaris]	0.810594	-0.302949	0.004601	down	yes	1.01	1.246	1.24	1.309	1.19	1	0.976	1.053	BP:ER to chloroplast lipid transport;BP:acylglycerol transport;CC:endoplasmic reticulum;CC:chloroplast outer membrane;MF:phosphatidic acid binding;MF:protein homodimerization activity;	GO:1990052;GO:0034196;GO:0005783;GO:0009707;GO:0070300;GO:0042803	------	------	------	------	------	------	------	------	------	nuclear	2	5	52.2	High
Transport related protein	XP_010689009.1	PREDICTED: two pore calcium channel protein 1A [Beta vulgaris subsp. vulgaris]	0.765959	-0.384661	0.004607	down	yes	0.9743	1.272	1.216	1.349	1.251	1	0.908	1.015	------	------	K16900	TPC1, CCH1	------	------	------	------	PF00520.28	Ion_trans	Ion transport protein	peroxisomal	7	9	85.4	High
Transport related protein	XP_010680054.1	PREDICTED: protein NRT1/ PTR FAMILY 8.3 [Beta vulgaris subsp. vulgaris]	0.8445	-0.243831	0.000868	down	yes	1.021	1.209	1.178	1.241	1.209	1	1.026	1.036	------	------	K14638	SLC15A3_4, PHT	------	------	COG3104	E:Amino acid transport and metabolism	PF00854.18;PF07690.13	PTR2;MFS_1	POT family;Major Facilitator Superfamily	peroxisomal	2	8	64.3	High
Transport related protein	XP_010690384.1	PREDICTED: CTL-like protein DDB_G0288717 [Beta vulgaris subsp. vulgaris]	0.829088	-0.270403	0.000936	down	yes	1.009	1.217	1.197	1.251	1.204	1	0.985	1.041	------	------	------	------	------	------	------	------	PF04515.9	Choline_transpo	Plasma-membrane choline transporter	plasma membrane	2	5	61.7	High
Transport related protein	XP_019105823.1	PREDICTED: tetraspanin-2-like [Beta vulgaris subsp. vulgaris]	0.754301	-0.406787	0.004672	down	yes	0.9557	1.267	1.18	1.353	1.269	1	0.933	0.934	------	------	------	------	------	------	------	------	PF00335.17	Tetraspannin	Tetraspanin family	plasma membrane	3	13	27.3	High
Transport related protein	XP_010679886.1	PREDICTED: vacuolar protein sorting-associated protein 35A [Beta vulgaris subsp. vulgaris]	0.76936	-0.378269	0.001038	down	yes	0.9617	1.25	1.261	1.283	1.205	1	0.916	0.969	------	------	K18468	VPS35	bvg04144	Endocytosis	------	------	PF03635.14	Vps35	Vacuolar protein sorting-associated protein 35	cytoplasmic	12	19	89.3	High
Transport related protein	XP_010688119.1	PREDICTED: sodium/pyruvate cotransporter BASS2, chloroplastic [Beta vulgaris subsp. vulgaris]	0.808949	-0.305879	0.0159	down	yes	0.9853	1.218	1.19	1.31	1.153	1	0.922	1.034	------	------	K03453	TC.BASS	------	------	COG0385	R:General function prediction only	PF01758.13;PF13593.3	SBF;SBF_like	Sodium Bile acid symporter family;SBF-like CPA transporter family	mitochondrial	3	7	44.8	High
Transport related protein	XP_010695348.1	PREDICTED: exocyst complex component SEC6 [Beta vulgaris subsp. vulgaris]	0.820583	-0.285278	0.000379	down	yes	0.9847	1.2	1.2	1.219	1.18	1	0.953	1.001	BP:exocytosis;BP:acceptance of pollen;CC:exocyst;CC:cytosol;CC:plasma membrane;CC:plasmodesma;	GO:0006887;GO:0060321;GO:0000145;GO:0005829;GO:0005886;GO:0009506	K06110	EXOC3, SEC6	------	------	COG5173	U:Intracellular trafficking, secretion, and vesicular transport	PF06046.10	Sec6	Exocyst complex component Sec6	cytoplasmic	5	6	86.2	High
Transport related protein	XP_010673858.1	PREDICTED: LETM1 and EF-hand domain-containing protein 1, mitochondrial [Beta vulgaris subsp. vulgaris]	0.824666	-0.278119	0.001354	down	yes	0.9863	1.196	1.179	1.222	1.186	1	0.942	1.017	------	------	K17800	LETM1, MDM38	------	------	------	------	PF07766.10;PF13499.3	LETM1;EF-hand_7	LETM1-like protein;EF-hand domain pair	mitochondrial	15	20	85.2	High
Transport related protein	XP_010670701.1	PREDICTED: potassium transporter 5 [Beta vulgaris subsp. vulgaris]	0.847203	-0.23922	0.01903	down	yes	0.9997	1.18	1.087	1.242	1.212	1	1.002	0.997	------	------	K03549	kup	------	------	COG3158	P:Inorganic ion transport and metabolism	PF02705.13	K_trans	K+ potassium transporter	peroxisomal	7	9	85.2	High
Transport related protein	XP_010694033.1	PREDICTED: solute carrier family 25 member 44 [Beta vulgaris subsp. vulgaris]	0.831753	-0.265773	0.000398	down	yes	0.9823	1.181	1.168	1.213	1.163	1	0.972	0.975	------	------	K15121	SLC25A44	------	------	------	------	PF00153.24	Mito_carr	Mitochondrial carrier protein	peroxisomal	5	19	34	High
Transport related protein	XP_010693271.1	PREDICTED: plastidic glucose transporter 4 [Beta vulgaris subsp. vulgaris]	0.838756	-0.253676	0.01292	down	yes	0.9847	1.174	1.117	1.244	1.16	1	0.938	1.016	------	------	------	------	------	------	------	------	PF00083.21;PF07690.13	Sugar_tr;MFS_1	Sugar;Major Facilitator Superfamily	cytoplasmic	5	11	57.5	High
Transport related protein	XP_010683337.1	PREDICTED: patellin-3 [Beta vulgaris subsp. vulgaris]	0.795913	-0.329317	0.0372	down	yes	0.9543	1.199	1.118	1.352	1.128	1	0.929	0.934	------	------	------	------	------	------	------	------	PF00650.17;PF03765.12	CRAL_TRIO;CRAL_TRIO_N	CRAL/TRIO domain;CRAL/TRIO, N-terminal domain	cytoplasmic	39	76	64.9	High
Transport related protein	XP_010677633.1	PREDICTED: syntaxin-132 [Beta vulgaris subsp. vulgaris]	0.834188	-0.261555	0.03104	down	yes	0.976	1.17	1.164	1.249	1.098	1	1.031	0.897	------	------	K08486	STX1B_2_3	bvg04130	SNARE interactions in vesicular transport	COG5074	U:Intracellular trafficking, secretion, and vesicular transport	PF00804.22;PF05739.16	Syntaxin;SNARE	Syntaxin;SNARE domain	cytoplasmic	11	28	34.7	High
Transport related protein	XP_010685643.1	PREDICTED: patellin-3 [Beta vulgaris subsp. vulgaris]	0.83537	-0.259513	0.004265	down	yes	0.9707	1.162	1.128	1.216	1.143	1	0.937	0.975	------	------	------	------	------	------	------	------	PF00650.17;PF03765.12	CRAL_TRIO;CRAL_TRIO_N	CRAL/TRIO domain;CRAL/TRIO, N-terminal domain	cytoplasmic	23	47	57.6	High
Transport related protein	XP_010666458.1	PREDICTED: vacuolar protein sorting-associated protein 2 homolog 1 [Beta vulgaris subsp. vulgaris]	0.823632	-0.279929	0.02048	down	yes	0.948	1.151	1.182	1.2	1.071	1	0.967	0.877	BP:vacuolar transport;	GO:0007034	K12191	CHMP2A	bvg04144	Endocytosis	COG5491	N:Cell motility	PF03357.18	Snf7	Snf7	cytoplasmic	2	9	25.2	High
Transport related protein	XP_010684101.1	PREDICTED: aquaporin PIP2-1 [Beta vulgaris subsp. vulgaris]	0.846926	-0.239692	0.04118	down	yes	0.9367	1.106	1.014	1.167	1.136	1	0.892	0.918	------	------	K09872	PIP	------	------	COG0580	G:Carbohydrate transport and metabolism	PF00230.17	MIP	Major intrinsic protein	Golgi apparatus	4	21	30.3	High
Transport related protein	XP_010695090.1	PREDICTED: vacuolar protein sorting-associated protein 32 homolog 2 [Beta vulgaris subsp. vulgaris]	0.777555	-0.362984	0.02055	down	yes	0.8903	1.145	1.175	1.183	1.076	1	0.874	0.797	BP:vacuolar transport;	GO:0007034	K12194	CHMP4, SNF7, VPS32	bvg04144	Endocytosis	------	------	PF03357.18	Snf7	Snf7	cytoplasmic	8	40	24	High
Transport related protein	XP_010690547.1	PREDICTED: nucleolar complex protein 4 homolog [Beta vulgaris subsp. vulgaris]	1.2196	0.286403	0.01202	up	yes	1.068	0.8757	0.916	0.88	0.831	1	1.078	1.125	------	------	K14771	NOC4, UTP19	------	------	------	------	PF03914.14	CBF	CBF/Mak21 family	cytoplasmic	4	8	67.8	High
Transport related protein	XP_010688757.1	PREDICTED: organic cation/carnitine transporter 2 [Beta vulgaris subsp. vulgaris]	1.35257	0.435706	0.03949	up	yes	1.078	0.797	0.858	0.756	0.777	1	1.253	0.98	------	------	------	------	------	------	------	------	PF00083.21;PF07690.13	Sugar_tr;MFS_1	Sugar;Major Facilitator Superfamily	plasma membrane	2	4	58	High
Transport related protein	XP_010687551.1	PREDICTED: oligouridylate-binding protein 1 [Beta vulgaris subsp. vulgaris]	1.30569	0.384812	0.001546	up	yes	1.058	0.8103	0.803	0.8	0.828	1	1.068	1.106	------	------	K13201	TIA1, TIAL1	------	------	------	------	PF00076.19	RRM_1	RNA recognition motif.	mitochondrial	3	13	45.7	High
Transport related protein	XP_010675157.1	PREDICTED: target of Myb protein 1 [Beta vulgaris subsp. vulgaris]	1.20005	0.263091	0.005355	up	yes	1.012	0.8433	0.875	0.803	0.852	1	1.055	0.981	------	------	------	------	------	------	------	------	PF00790.16;PF03127.11	VHS;GAT	VHS domain;GAT domain	cytoplasmic	3	6	50.3	High
Transport related protein	XP_010691703.1	PREDICTED: transmembrane 9 superfamily member 2 [Beta vulgaris subsp. vulgaris]	1.25381	0.326316	0.0128	up	yes	1.029	0.8207	0.866	0.757	0.839	1	0.987	1.101	------	------	------	------	------	------	------	------	PF02990.13	EMP70	Endomembrane protein 70	ER	6	19	68	High
Transport related protein	XP_010671454.1	PREDICTED: protein SABRE [Beta vulgaris subsp. vulgaris]	1.27923	0.355273	0.03616	up	yes	1.034	0.8083	0.926	0.809	0.69	1	1.018	1.084	------	------	------	------	------	------	------	------	PF10351.6	Apt1	Golgi-body localisation protein domain	ER	2	1	294.1	High
Transport related protein	XP_010694756.1	PREDICTED: WPP domain-interacting protein 2 [Beta vulgaris subsp. vulgaris]	1.27812	0.354023	0.000393	up	yes	1.017	0.7957	0.813	0.767	0.807	1	1.045	1.006	CC:integral component of membrane;	GO:0016021	------	------	------	------	------	------	------	------	------	nuclear	4	10	66.2	High
Transport related protein	XP_010691704.1	PREDICTED: transmembrane 9 superfamily member 3 [Beta vulgaris subsp. vulgaris]	1.2007	0.263877	0.005897	up	yes	0.959	0.7987	0.821	0.77	0.805	1	0.911	0.966	------	------	------	------	------	------	------	------	PF02990.13	EMP70	Endomembrane protein 70	ER	3	15	68.2	High
Transport related protein	XP_010676826.1	PREDICTED: PRA1 family protein B4 [Beta vulgaris subsp. vulgaris]	1.35319	0.436369	0.0405	up	yes	0.913	0.6747	0.802	0.585	0.637	1	0.845	0.894	------	------	K20359	RABAC1, PRAF1	------	------	COG5130	U:Intracellular trafficking, secretion, and vesicular transport	PF03208.16	PRA1	PRA1 family protein	peroxisomal	3	16	24.4	High
Transport related protein	XP_010675484.1	PREDICTED: CASP-like protein 1B2 isoform X2 [Beta vulgaris subsp. vulgaris]	0.847257	-0.239128	0.03783	down	yes	1.004	1.185	1.203	1.224	1.127	1	0.918	1.095	------	------	------	------	------	------	------	------	PF04535.9	DUF588	Domain of unknown function	ER	4	13	21.5	High
Transport related protein	XP_010691925.1	PREDICTED: xylulose 5-phosphate/phosphate translocator, chloroplastic [Beta vulgaris subsp. vulgaris]	0.814964	-0.295192	0.01154	down	yes	1.013	1.243	1.219	1.328	1.181	1	1.066	0.973	------	------	------	------	------	------	------	------	------	------	------	peroxisomal	4	26	18.3	High
Transport related protein	XP_019104255.1	PREDICTED: ammonium transporter 1 member 1-like [Beta vulgaris subsp. vulgaris]	0.78749	-0.344667	0.01195	down	yes	0.9757	1.239	1.174	1.339	1.203	1	0.912	1.015	------	------	K07573	CSL4, EXOSC1	bvg03018	RNA degradation	------	------	PF00909.18;PF10447.6;PF14382.3	Ammonium_transp;EXOSC1;ECR1_N	Ammonium Transporter Family;Exosome component EXOSC1/CSL4;Exosome complex exonuclease RRP4 N-terminal region	cytoplasmic	11	10	109.2	High
Transport related protein	XP_010688190.1	PREDICTED: vacuolar protein sorting-associated protein [Beta vulgaris subsp. vulgaris]	1.5863	0.665662	0.01565	up	yes	1.102	0.6947	0.748	0.606	0.73	1	1.282	1.023	------	------	------	------	------	------	------	------	PF03398.11	Ist1	Regulator of Vps4 activity in the MVB pathway	nuclear	2	2	73.9	High
Others	XP_010692939.1	PREDICTED: structural maintenance of chromosomes protein 2-1 [Beta vulgaris subsp. vulgaris]	0.759448	-0.396978	0.01938	down	yes	1.045	1.376	1.285	1.523	1.319	1	1.137	0.999	BP:chromosome organization;CC:nucleus;CC:chromosome;MF:ATP binding;	GO:0051276;GO:0005634;GO:0005694;GO:0005524	K06674	SMC2	------	------	COG1196	D:Cell cycle control, cell division, chromosome partitioning	PF02463.16;PF06470.10;PF13476.3;PF13304.3	SMC_N;SMC_hinge;AAA_23;AAA_21	RecF/RecN/SMC N terminal domain;SMC proteins Flexible Hinge Domain;AAA domain;AAA domain, putative AbiEii toxin, Type IV TA system	nuclear	2	2	133.2	High
Others	XP_010680020.1	PREDICTED: protein NUCLEAR FUSION DEFECTIVE 4 [Beta vulgaris subsp. vulgaris]	0.773349	-0.370808	0.000378	down	yes	0.9837	1.272	1.289	1.301	1.226	1	0.961	0.99	------	------	------	------	------	------	------	------	PF06813.10	Nodulin-like	Nodulin-like	ER	7	12	64.1	High
Others	XP_010680288.1	PREDICTED: pollen-specific leucine-rich repeat extensin-like protein 1 isoform X2 [Beta vulgaris subsp. vulgaris]	0.787371	-0.344885	0.01658	down	yes	0.9913	1.259	1.229	1.387	1.16	1	0.992	0.982	------	------	------	------	------	------	------	------	------	------	------	cytoplasmic	4	28	14.9	High
Others	XP_010683695.1	PREDICTED: UPF0426 protein At1g28150, chloroplastic [Beta vulgaris subsp. vulgaris]	0.847303	-0.23905	0.02509	down	yes	1.021	1.205	1.114	1.284	1.216	1	1.006	1.057	------	------	------	------	------	------	------	------	------	------	------	cytoplasmic	2	12	13.1	High
Others	XP_010682397.1	PREDICTED: actin-related protein 2/3 complex subunit 2A [Beta vulgaris subsp. vulgaris]	0.837385	-0.256037	0.00538	down	yes	0.999	1.193	1.136	1.255	1.189	1	0.984	1.013	------	------	K05758	ARPC2	bvg04144	Endocytosis	------	------	PF04045.11	P34-Arc	Arp2/3 complex, 34 kD subunit p34-Arc	ER	3	12	37.4	High
Others	XP_010685371.1	PREDICTED: mitotic apparatus protein p62 [Beta vulgaris subsp. vulgaris]	0.816043	-0.293283	0.0267	down	yes	0.9817	1.203	1.154	1.329	1.125	1	0.981	0.964	------	------	------	------	------	------	------	------	------	------	------	nuclear	3	8	39.5	High
Others	XP_010691075.1	PREDICTED: protein NUCLEAR FUSION DEFECTIVE 4 [Beta vulgaris subsp. vulgaris]	0.832596	-0.264312	0.01994	down	yes	0.9783	1.175	1.076	1.209	1.24	1	0.95	0.985	------	------	------	------	------	------	------	------	PF06813.10;PF07690.13	Nodulin-like;MFS_1	Nodulin-like;Major Facilitator Superfamily	mitochondrial	2	6	61.3	High
Others	XP_010678735.1	PREDICTED: protein NUCLEAR FUSION DEFECTIVE 2 [Beta vulgaris subsp. vulgaris]	0.844493	-0.243843	0.006433	down	yes	0.9737	1.153	1.15	1.21	1.1	1	0.962	0.959	------	------	------	------	------	------	------	------	PF14622.3	Ribonucleas_3_3	Ribonuclease-III-like	ER	3	18	20.4	High
Others	XP_010684190.2	PREDICTED: LOW QUALITY PROTEIN: plasma membrane-associated cation-binding protein 1 [Beta vulgaris subsp. vulgaris]	0.808752	-0.30623	0.01777	down	yes	0.9333	1.154	1.179	1.215	1.067	1	0.881	0.919	------	------	------	------	------	------	------	------	PF05558.9	DREPP	DREPP plasma membrane polypeptide	cytoplasmic	10	60	18.4	High
Others	XP_010686711.1	PREDICTED: putative MO25-like protein At5g47540 [Beta vulgaris subsp. vulgaris]	0.828738	-0.271013	0.01526	down	yes	0.9257	1.117	1.155	1.13	1.067	1	0.91	0.867	------	------	K08272	CAB39, MO25	------	------	------	------	PF08569.8	Mo25	Mo25-like	cytoplasmic	7	24	39.2	High
Others	XP_010692443.1	PREDICTED: protein CROWDED NUCLEI 1 isoform X1 [Beta vulgaris subsp. vulgaris]	0.828911	-0.27071	0.02441	down	yes	0.906	1.093	1.108	1.057	1.113	1	0.83	0.888	------	------	------	------	------	------	------	------	------	------	------	cytoplasmic	22	18	133	High
Others	XP_010685339.1	PREDICTED: ankyrin repeat-containing protein ITN1 isoform X1 [Beta vulgaris subsp. vulgaris]	1.21916	0.285885	0.02157	up	yes	1.092	0.8957	0.897	0.911	0.879	1	1.093	1.183	------	------	------	------	------	------	------	------	PF12796.4;PF13857.3;PF13637.3;PF00023.27;PF13606.3	Ank_2;Ank_5;Ank_4;Ank;Ank_3	Ankyrin repeats;Ankyrin repeats;Ankyrin repeats;Ankyrin repeat;Ankyrin repeat	nuclear	4	13	48.8	High
Others	XP_010671631.2	PREDICTED: putative septum site-determining protein minD homolog, chloroplastic [Beta vulgaris subsp. vulgaris]	1.22947	0.298035	0.02728	up	yes	1.018	0.828	0.919	0.788	0.777	1	0.973	1.08	------	------	K03609	minD	------	------	COG2894	D:Cell cycle control, cell division, chromosome partitioning	PF01656.20;PF10609.6;PF13614.3;PF00142.15;PF09140.8;PF02374.12;PF06564.9	CbiA;ParA;AAA_31;Fer4_NifH;MipZ;ArsA_ATPase;CBP_BcsQ	CobQ/CobB/MinD/ParA nucleotide binding domain;NUBPL iron-transfer P-loop NTPase;AAA domain;4Fe-4S iron sulfur cluster binding proteins, NifH/frxC family;ATPase MipZ;Anion-transporting ATPase;Cellulose biosynthesis protein BcsQ	chloroplast	2	7	35.3	High
Others	XP_010685537.1	PREDICTED: protein BUD31 homolog 2 [Beta vulgaris subsp. vulgaris]	1.25075	0.32279	0.01002	up	yes	0.9627	0.7697	0.791	0.746	0.772	1	0.883	1.005	------	------	K12873	BUD31, G10	bvg03040	Spliceosome	COG5132;COG5132	D:Cell cycle control, cell division, chromosome partitioning;K:Transcription	PF01125.14	G10	G10 protein	cytoplasmic	6	40	17.1	High
Others	XP_010688162.1	PREDICTED: EG45-like domain containing protein [Beta vulgaris subsp. vulgaris]	1.33374	0.415483	0.02398	up	yes	0.9723	0.729	0.804	0.699	0.684	1	1.055	0.862	------	------	------	------	------	------	------	------	PF03330.15	DPBB_1	Lytic transglycolase	extracellular	2	35	13.4	High
Others	XP_010690125.1	PREDICTED: basic 7S globulin [Beta vulgaris subsp. vulgaris]	1.25399	0.326523	0.01717	up	yes	1.022	0.815	0.785	0.827	0.833	1	1.119	0.948	------	------	------	------	------	------	------	------	PF14541.3;PF14543.3	TAXi_C;TAXi_N	Xylanase inhibitor C-terminal;Xylanase inhibitor N-terminal	ER	14	39	47.9	High
Others	XP_010667343.1	PREDICTED: basic 7S globulin [Beta vulgaris subsp. vulgaris]	1.28241	0.358861	0.01314	up	yes	0.999	0.779	0.732	0.81	0.795	1	1.078	0.919	MF:aspartic-type endopeptidase activity;	GO:0004190	------	------	------	------	------	------	PF14541.3;PF14543.3	TAXi_C;TAXi_N	Xylanase inhibitor C-terminal;Xylanase inhibitor N-terminal	ER	17	56	46.2	High
Others	XP_010681100.1	PREDICTED: EG45-like domain containing protein 2 [Beta vulgaris subsp. vulgaris]	1.48359	0.569092	0.005002	up	yes	0.9357	0.6307	0.628	0.575	0.689	1	0.853	0.954	------	------	------	------	------	------	------	------	PF03330.15	DPBB_1	Lytic transglycolase	extracellular	4	46	13.5	High
Others	XP_010673859.1	PREDICTED: sister chromatid cohesion 1 protein 4 [Beta vulgaris subsp. vulgaris]	0.808594	-0.306513	0.03939	down	yes	1.035	1.28	1.184	1.424	1.232	1	1.105	1.001	------	------	K06670	SCC1, MCD1, RAD21	------	------	------	------	PF04825.10;PF04824.13	Rad21_Rec8_N;Rad21_Rec8	N terminus of Rad21 / Rec8 like protein;Conserved region of Rad21 / Rec8 like protein	ER	4	3	137.6	High
Others	XP_010680282.1	PREDICTED: angio-associated migratory cell protein [Beta vulgaris subsp. vulgaris]	1.39997	0.485399	0.01312	up	yes	1.035	0.7393	0.795	0.713	0.71	1	0.946	1.158	------	------	------	------	------	------	------	------	PF00400.29;PF12894.4;PF17005.2	WD40;ANAPC4_WD40;WD40_like	WD domain, G-beta repeat;Anaphase-promoting complex subunit 4 WD40 domain;WD40-like domain	cytoplasmic	5	13	42.6	High
Unknown	XP_010673134.1	PREDICTED: uncharacterized protein LOC104889574 [Beta vulgaris subsp. vulgaris]	1.51575	0.600033	0.002683	up	yes	0.919	0.6063	0.589	0.654	0.576	1	0.877	0.88	------	------	------	------	------	------	------	------	PF04862.9	DUF642	Protein of unknown function	extracellular	4	15	40.7	High
Unknown	XP_010683295.1	PREDICTED: uncharacterized protein LOC104898002 [Beta vulgaris subsp. vulgaris]	0.781987	-0.354783	0.04004	down	yes	1.094	1.399	1.288	1.577	1.331	1	1.148	1.134	------	------	------	------	------	------	------	------	PF04601.10;PF06268.10	DUF569;Fascin	Domain of unknown function;Fascin domain	cytoplasmic	4	10	56.8	High
Unknown	XP_010673533.1	PREDICTED: uncharacterized protein LOC104889894 [Beta vulgaris subsp. vulgaris]	0.806426	-0.310385	0.002492	down	yes	1.029	1.276	1.342	1.253	1.233	1	1.042	1.045	------	------	------	------	------	------	------	------	------	------	------	cytoplasmic	2	3	64.8	High
Unknown	XP_010696529.1	PREDICTED: uncharacterized protein LOC104909045 [Beta vulgaris subsp. vulgaris]	0.737652	-0.438989	0.01263	down	yes	0.9737	1.32	1.315	1.46	1.185	1	0.961	0.96	------	------	------	------	------	------	------	------	------	------	------	cytoplasmic	17	67	29.1	High
Unknown	XP_010675658.1	PREDICTED: uncharacterized protein LOC104891639 isoform X1 [Beta vulgaris subsp. vulgaris]	0.783677	-0.351669	0.009705	down	yes	0.989	1.262	1.296	1.342	1.148	1	0.984	0.983	------	------	------	------	------	------	------	------	------	------	------	chloroplast	7	31	25.9	High
Unknown	XP_010671860.1	PREDICTED: uncharacterized protein LOC104888539 [Beta vulgaris subsp. vulgaris]	0.802228	-0.317916	0.000338	down	yes	0.9723	1.212	1.19	1.225	1.222	1	0.939	0.978	------	------	------	------	------	------	------	------	------	------	------	chloroplast	21	28	102	High
Unknown	XP_010681351.1	PREDICTED: uncharacterized protein LOC104896314 [Beta vulgaris subsp. vulgaris]	0.84178	-0.248485	0.03995	down	yes	0.9933	1.18	1.108	1.28	1.152	1	0.93	1.05	------	------	------	------	------	------	------	------	PF06880.8	DUF1262	Protein of unknown function	cytoplasmic	9	24	44.6	High
Unknown	XP_010690184.1	PREDICTED: uncharacterized protein LOC104903771 [Beta vulgaris subsp. vulgaris]	0.810151	-0.303737	0.008069	down	yes	0.9657	1.192	1.122	1.27	1.185	1	0.954	0.943	------	------	------	------	------	------	------	------	PF03080.12;PF14365.3	DUF239;DUF4409	Domain of unknown function;Domain of unknown function	plasma membrane	3	10	42.8	High
Unknown	XP_010688752.1	PREDICTED: uncharacterized protein LOC104902615 [Beta vulgaris subsp. vulgaris]	0.814335	-0.296306	0.01422	down	yes	0.943	1.158	1.118	1.23	1.125	1	0.955	0.874	------	------	K19022	AP5B1	------	------	------	------	------	------	------	cytoplasmic	2	2	126.4	High
Unknown	XP_010667285.1	PREDICTED: uncharacterized protein LOC104884345 [Beta vulgaris subsp. vulgaris]	0.810908	-0.302391	0.02251	down	yes	0.9293	1.146	1.057	1.221	1.161	1	0.908	0.88	CC:integral component of membrane;	GO:0016021	------	------	------	------	------	------	------	------	------	peroxisomal	2	13	15.1	High
Unknown	XP_010671007.1	PREDICTED: uncharacterized protein LOC104887920 isoform X1 [Beta vulgaris subsp. vulgaris]	0.842844	-0.246662	0.009479	down	yes	0.9423	1.118	1.14	1.116	1.097	1	0.949	0.878	------	------	------	------	------	------	------	------	------	------	------	nuclear	3	3	141.7	High
Unknown	XP_010674827.1	PREDICTED: uncharacterized protein LOC104890909 [Beta vulgaris subsp. vulgaris]	0.843806	-0.245017	0.005444	down	yes	0.94	1.114	1.098	1.125	1.12	1	0.898	0.922	------	------	------	------	------	------	------	------	------	------	------	cytoplasmic	10	30	35.7	High
Unknown	XP_019105229.1	PREDICTED: uncharacterized protein LOC104894138 [Beta vulgaris subsp. vulgaris]	1.34255	0.424974	0.01066	up	yes	1.117	0.832	0.834	0.8	0.862	1	1.148	1.202	------	------	K00602	purH	bvg00230;bvg00670	Purine metabolism;One carbon pool by folate	COG0138	F:Nucleotide transport and metabolism	PF01808.15;PF02142.19	AICARFT_IMPCHas;MGS	AICARFT/IMPCHase bienzyme;MGS-like domain	chloroplast	5	39	65.8	High
Unknown	XP_010672158.1	PREDICTED: uncharacterized protein LOC104888784 isoform X1 [Beta vulgaris subsp. vulgaris]	1.34533	0.427954	0.008844	up	yes	1.092	0.8117	0.794	0.807	0.834	1	1.078	1.198	------	------	------	------	------	------	------	------	------	------	------	mitochondrial	3	3	111.3	High
Unknown	XP_010679551.1	PREDICTED: uncharacterized protein LOC104894892 isoform X1 [Beta vulgaris subsp. vulgaris]	1.20557	0.269715	0.000218	up	yes	0.987	0.8187	0.803	0.841	0.812	1	0.979	0.982	------	------	------	------	------	------	------	------	------	------	------	cytoplasmic	2	9	21.3	High
Unknown	XP_010674884.1	PREDICTED: uncharacterized protein LOC104890962 [Beta vulgaris subsp. vulgaris]	1.44613	0.532196	0.03165	up	yes	1.059	0.7323	0.814	0.665	0.718	1	0.94	1.238	------	------	------	------	------	------	COG0590;COG0590	F:Nucleotide transport and metabolism;J:Translation, ribosomal structure and biogenesis	PF00383.20;PF14437.3	dCMP_cyt_deam_1;MafB19-deam	Cytidine and deoxycytidylate deaminase zinc-binding region;MafB19-like deaminase	cytoplasmic	3	17	19.9	High
